# Supplementary material for: Cytospyrone and Cytospomarin: Two New Polyketides Isolated from Mangrove Endophytic Fungus, Cytospora sp
Source: PubMed Central journal article supplement (PMC7570828; doi:10.3390/molecules25184224), 2020-09-15
Supplement: molecules-25-04224-s001.pdf [file molecules-25-04224-s001.pdf]

## Supporting Information

Cytospyrone and Cytospomarin: Two New Polyketides Isolated from Mangrove Endophytic Fungus, *Cytospora* sp.

Chengwen Wei,<sup>a</sup> Qin Deng,<sup>b</sup> Mengyu Sun,<sup>a</sup> Jing Xu<sup>a, b, \*</sup>

<sup>a</sup> Key Laboratory of Advanced Materials of Tropical Island Resources of Ministry of Education, School of Chemical Engineering and Technology, Hainan University, Haikou 570228, P. R. China.

<sup>b</sup> College of Horticulture and Landscape, Hainan University, Haikou 570228, P. R. China

\* To whom correspondence should be addressed.

Prof. Dr. Jing Xu, Tel.: ++86–898–6627–9226, Fax: ++86–898–6627–9010, E-mail:

[happyjing3@163.com](mailto:happyjing3@163.com)

## Contents

|                                                                                                                                                                           |    |
|---------------------------------------------------------------------------------------------------------------------------------------------------------------------------|----|
| <b>Table S1.</b> Gibbs free energies <sup>a</sup> and equilibrium populations <sup>b</sup> of low-energy conformers of cytospyrone (1) -----                              | 3  |
| <b>Table S2.</b> Cartesian coordinates for the low-energy reoptimized MMFF conformers of cytospyrone (1) at B3LYP/6-31G(d,p) level of theory in gas-----                  | 3  |
| <b>Table S3.</b> Gibbs free energies <sup>a</sup> and equilibrium populations <sup>b</sup> of low-energy conformers of cytospomarin (2) -----                             | 19 |
| <b>Table S4.</b> Cartesian coordinates for the low-energy reoptimized MMFF conformers of cytospomarin (2) at B3LYP/6-31G(d,p) level of theory in gas-----                 | 19 |
| <b>Table S5.</b> Gibbs free energies <sup>a</sup> and equilibrium populations <sup>b</sup> of low-energy conformers of cytospomarin (2)-----                              | 26 |
| <b>Table S6.</b> Cartesian coordinates for the low-energy reoptimized MMFF conformers of cytospomarin (2) at B3LYP/6-31+G(d,p) level of theory in CH <sub>3</sub> OH----- | 26 |
| <b>Figure S1.</b> <sup>1</sup> H-NMR of cytospyrone (1) -----                                                                                                             | 34 |
| <b>Figure S2.</b> <sup>13</sup> C-NMR of cytospyrone (1) -----                                                                                                            | 35 |
| <b>Figure S3.</b> DEPT of cytospyrone (1) -----                                                                                                                           | 35 |
| <b>Figure S4.</b> <sup>1</sup> H- <sup>1</sup> H COSY of cytospyrone (1) -----                                                                                            | 36 |
| <b>Figure S5.</b> HMQC of cytospyrone (1) -----                                                                                                                           | 36 |
| <b>Figure S6.</b> HMBC of cytospyrone (1) -----                                                                                                                           | 37 |
| <b>Figure S7.</b> ROESY of cytospyrone (1) -----                                                                                                                          | 37 |
| <b>Figure S8.</b> HR-ESI-MS of cytospyrone (1) -----                                                                                                                      | 38 |
| <b>Figure S9.</b> CD spectrum of cytospyrone (1) -----                                                                                                                    | 38 |
| <b>Figure S10.</b> <sup>1</sup> H-NMR of cytospomarin (2) -----                                                                                                           | 38 |
| <b>Figure S11.</b> <sup>13</sup> C-NMR of cytospomarin (2) -----                                                                                                          | 39 |
| <b>Figure S12.</b> DEPT of cytospomarin (2) -----                                                                                                                         | 39 |
| <b>Figure S13.</b> <sup>1</sup> H- <sup>1</sup> H COSY of cytospomarin (2) -----                                                                                          | 40 |
| <b>Figure S14.</b> HMQC of cytospomarin (2) -----                                                                                                                         | 40 |
| <b>Figure S15.</b> HMBC of cytospomarin (2) -----                                                                                                                         | 41 |
| <b>Figure S16.</b> ROESY of cytospomarin (2) -----                                                                                                                        | 41 |
| <b>Figure S17.</b> HR-ESI-MS of cytospomarin (2) -----                                                                                                                    | 42 |

**Figure S18.** CD spectrum of cytosporarin (**2**)-----42

**Table S1.** Gibbs free energies<sup>a</sup> and equilibrium populations<sup>b</sup> of low-energy conformers of cytosprone (**1**)

| Conformers  | In MeOH          |                      |
|-------------|------------------|----------------------|
|             | $G^a$            | $P$ (%) <sup>b</sup> |
| <b>1-1</b>  | -725339.39572185 | 1.63                 |
| <b>1-2</b>  | -725340.33886938 | 8.03                 |
| <b>1-3</b>  | -725341.33221771 | 43.01                |
| <b>1-4</b>  | -725341.3378653  | 43.42                |
| <b>1-5</b>  | -725338.49650002 | 0.36                 |
| <b>1-6</b>  | -725338.01017977 | 0.16                 |
| <b>1-7</b>  | -725339.77411038 | 3.09                 |
| <b>1-8</b>  | -725336.54117886 | 0.01                 |
| <b>1-9</b>  | -725334.89835768 | 0.29                 |
| <b>1-10</b> | -725334.89522013 | 0                    |
| <b>1-11</b> | -725338.37162553 | 0.29                 |

<sup>a</sup>B3LYP/6-31G(d,p), in kcal/mol. <sup>b</sup>From  $G$  values at 298.15K.

**Table S2.** Cartesian coordinates for the low-energy reoptimized MMFF conformers of cytosprone (**1**) at B3LYP/6-31G(d,p) level of theory in gas

Conformer **1-1**

| <b>1-1</b>    |               | Standard Orientation<br>(Ångstroms) |           |           |           |
|---------------|---------------|-------------------------------------|-----------|-----------|-----------|
| Center number | Atomic number | Atomic Type                         | X         | Y         | Z         |
| 1.            | 8.            | 0.                                  | -0.895087 | -0.272528 | 0.567277  |
| 2.            | 6.            | 0.                                  | -1.732054 | 0.776064  | 0.675706  |
| 3.            | 6.            | 0.                                  | -3.049197 | 0.664222  | 0.375178  |
| 4.            | 6.            | 0.                                  | -3.550068 | -0.600520 | -0.081907 |
| 5.            | 6.            | 0.                                  | -2.711087 | -1.688177 | -0.203401 |
| 6.            | 6.            | 0.                                  | -1.322783 | -1.547059 | 0.140821  |
| 7.            | 6.            | 0.                                  | -1.035262 | 2.041814  | 1.133890  |
| 8.            | 6.            | 0.                                  | -0.432246 | 2.878388  | -0.049307 |
| 9.            | 6.            | 0.                                  | 0.664974  | 2.114328  | -0.790418 |
| 10.           | 6.            | 0.                                  | 1.900954  | 2.006583  | -0.272899 |
| 11.           | 6.            | 0.                                  | 3.083796  | 1.219207  | -0.802134 |
| 12.           | 6.            | 0.                                  | 3.218200  | -0.044372 | 0.027325  |
| 13.           | 6.            | 0.                                  | 3.124740  | -1.321390 | -0.374289 |
| 14.           | 6.            | 0.                                  | 3.240357  | -2.494833 | 0.599404  |
| 15.           | 6.            | 0.                                  | 3.297735  | -2.135813 | 2.086083  |
| 16.           | 8.            | 0.                                  | 2.213129  | -3.452321 | 0.355676  |
| 17.           | 6.            | 0.                                  | 2.895396  | -1.758505 | -1.802162 |
| 18.           | 6.            | 0.                                  | 4.371367  | 2.066102  | -0.731066 |

|     |    |    |           |           |           |
|-----|----|----|-----------|-----------|-----------|
| 19. | 6. | 0. | 0.233095  | 1.500096  | -2.100576 |
| 20. | 6. | 0. | 0.006539  | 4.252317  | 0.483808  |
| 21. | 8. | 0. | -0.081637 | 1.754807  | 2.134259  |
| 22. | 8. | 0. | -0.476391 | -2.421816 | 0.097782  |
| 23. | 6. | 0. | -3.158358 | -3.047720 | -0.663054 |
| 24. | 8. | 0. | -4.851425 | -0.782402 | -0.405702 |
| 25. | 6. | 0. | -5.768936 | 0.302544  | -0.293583 |
| 26. | 1. | 0. | -3.690222 | 1.526846  | 0.490427  |
| 27. | 1. | 0. | -1.794348 | 2.669254  | 1.614652  |
| 28. | 1. | 0. | -1.258112 | 3.042608  | -0.754601 |
| 29. | 1. | 0. | 2.103118  | 2.513467  | 0.671006  |
| 30. | 1. | 0. | 2.912152  | 0.956693  | -1.847907 |
| 31. | 1. | 0. | 3.391208  | 0.152375  | 1.084880  |
| 32. | 1. | 0. | 4.169598  | -3.028905 | 0.346849  |
| 33. | 1. | 0. | 2.399904  | -1.588700 | 2.394580  |
| 34. | 1. | 0. | 4.175169  | -1.529723 | 2.334705  |
| 35. | 1. | 0. | 3.344808  | -3.061219 | 2.665604  |
| 36. | 1. | 0. | 1.351939  | -3.001857 | 0.413052  |
| 37. | 1. | 0. | 1.903597  | -2.208176 | -1.909727 |
| 38. | 1. | 0. | 3.614904  | -2.537728 | -2.080587 |
| 39. | 1. | 0. | 2.990205  | -0.941906 | -2.520617 |
| 40. | 1. | 0. | 5.225563  | 1.505124  | -1.122055 |
| 41. | 1. | 0. | 4.267607  | 2.989828  | -1.310255 |
| 42. | 1. | 0. | 4.600899  | 2.344064  | 0.304309  |
| 43. | 1. | 0. | -0.050993 | 2.285694  | -2.813751 |
| 44. | 1. | 0. | 1.006203  | 0.887370  | -2.564790 |
| 45. | 1. | 0. | -0.652703 | 0.867766  | -1.968865 |
| 46. | 1. | 0. | -0.854511 | 4.808299  | 0.871515  |
| 47. | 1. | 0. | 0.725283  | 4.150876  | 1.299937  |
| 48. | 1. | 0. | 0.466649  | 4.845152  | -0.311188 |
| 49. | 1. | 0. | 0.571504  | 1.160388  | 1.731984  |
| 50. | 1. | 0. | -2.590656 | -3.361569 | -1.545275 |
| 51. | 1. | 0. | -2.967079 | -3.797631 | 0.111796  |
| 52. | 1. | 0. | -4.220936 | -3.050672 | -0.904675 |
| 53. | 1. | 0. | -6.733343 | -0.096759 | -0.607996 |
| 54. | 1. | 0. | -5.492179 | 1.134171  | -0.951383 |
| 55. | 1. | 0. | -5.846899 | 0.659299  | 0.739527  |

Conformer 1-2

| 1-2           |             | Standard Orientation<br>(Ångstroms) |           |           |           |
|---------------|-------------|-------------------------------------|-----------|-----------|-----------|
| Center number | Atom number | Type                                | X         | Y         | Z         |
| 1.            | 8.          | 0.                                  | 0.942076  | -0.216214 | -0.699264 |
| 2.            | 6.          | 0.                                  | 1.799227  | 0.819418  | -0.645090 |
| 3.            | 6.          | 0.                                  | 3.086890  | 0.653150  | -0.254652 |
| 4.            | 6.          | 0.                                  | 3.531794  | -0.657787 | 0.122245  |
| 5.            | 6.          | 0.                                  | 2.671493  | -1.734755 | 0.075624  |
| 6.            | 6.          | 0.                                  | 1.319415  | -1.536126 | -0.369129 |
| 7.            | 6.          | 0.                                  | 1.159220  | 2.136892  | -1.035910 |
| 8.            | 6.          | 0.                                  | 0.494237  | 2.881840  | 0.173798  |
| 9.            | 6.          | 0.                                  | -0.665556 | 2.086037  | 0.772080  |
| 10.           | 6.          | 0.                                  | -1.875551 | 2.070308  | 0.186669  |
| 11.           | 6.          | 0.                                  | -3.107170 | 1.290749  | 0.613665  |
| 12.           | 6.          | 0.                                  | -3.128724 | -0.042284 | -0.110929 |
| 13.           | 6.          | 0.                                  | -3.236696 | -1.274102 | 0.409325  |
| 14.           | 6.          | 0.                                  | -3.203158 | -2.536323 | -0.455915 |
| 15.           | 6.          | 0.                                  | -3.052029 | -2.319005 | -1.962117 |
| 16.           | 8.          | 0.                                  | -2.205088 | -3.438228 | 0.022114  |
| 17.           | 6.          | 0.                                  | -3.399033 | -1.577874 | 1.879492  |
| 18.           | 6.          | 0.                                  | -4.384266 | 2.101761  | 0.311025  |
| 19.           | 6.          | 0.                                  | -0.333940 | 1.329907  | 2.036687  |
| 20.           | 6.          | 0.                                  | 0.119835  | 4.307632  | -0.263117 |
| 21.           | 8.          | 0.                                  | 0.269932  | 1.962874  | -2.118172 |
| 22.           | 8.          | 0.                                  | 0.462987  | -2.392707 | -0.490431 |
| 23.           | 6.          | 0.                                  | 3.063713  | -3.138455 | 0.444042  |
| 24.           | 8.          | 0.                                  | 4.800196  | -0.895846 | 0.529502  |
| 25.           | 6.          | 0.                                  | 5.731848  | 0.179601  | 0.614396  |
| 26.           | 1.          | 0.                                  | 3.747139  | 1.508765  | -0.240255 |
| 27.           | 1.          | 0.                                  | 1.960831  | 2.784758  | -1.408476 |
| 28.           | 1.          | 0.                                  | 1.273568  | 2.961745  | 0.943742  |
| 29.           | 1.          | 0.                                  | -2.014046 | 2.661868  | -0.718280 |
| 30.           | 1.          | 0.                                  | -3.069910 | 1.120625  | 1.692522  |
| 31.           | 1.          | 0.                                  | -3.035663 | 0.053431  | -1.192035 |
| 32.           | 1.          | 0.                                  | -4.151090 | -3.067692 | -0.282303 |
| 33.           | 1.          | 0.                                  | -2.104026 | -1.821220 | -2.192131 |
| 34.           | 1.          | 0.                                  | -3.870945 | -1.722873 | -2.377560 |
| 35.           | 1.          | 0.                                  | -3.047991 | -3.293150 | -2.457832 |
| 36.           | 1.          | 0.                                  | -1.337116 | -3.034168 | -0.154373 |
| 37.           | 1.          | 0.                                  | -2.627597 | -2.284040 | 2.199395  |
| 38.           | 1.          | 0.                                  | -4.363203 | -2.071833 | 2.060055  |

|     |    |    |           |           |           |
|-----|----|----|-----------|-----------|-----------|
| 39. | 1. | 0. | -3.359244 | -0.691581 | 2.515656  |
| 40. | 1. | 0. | -5.274321 | 1.562481  | 0.647885  |
| 41. | 1. | 0. | -4.359558 | 3.077036  | 0.809499  |
| 42. | 1. | 0. | -4.489407 | 2.278063  | -0.765914 |
| 43. | 1. | 0. | -0.115240 | 2.029365  | 2.855087  |
| 44. | 1. | 0. | -1.135730 | 0.666272  | 2.360534  |
| 45. | 1. | 0. | 0.565551  | 0.717572  | 1.905638  |
| 46. | 1. | 0. | 1.015792  | 4.871443  | -0.546403 |
| 47. | 1. | 0. | -0.546833 | 4.295507  | -1.128119 |
| 48. | 1. | 0. | -0.378043 | 4.842133  | 0.550227  |
| 49. | 1. | 0. | -0.418755 | 1.351021  | -1.813960 |
| 50. | 1. | 0. | 2.350037  | -3.557649 | 1.159899  |
| 51. | 1. | 0. | 3.042998  | -3.791674 | -0.435520 |
| 52. | 1. | 0. | 4.063935  | -3.165797 | 0.875992  |
| 53. | 1. | 0. | 6.660209  | -0.265637 | 0.972560  |
| 54. | 1. | 0. | 5.401006  | 0.944171  | 1.326317  |
| 55. | 1. | 0. | 5.907546  | 0.638545  | -0.364968 |

### Conformer 1-3

| 1-3           |             | Standard Orientation<br>(Ångstroms) |           |           |           |
|---------------|-------------|-------------------------------------|-----------|-----------|-----------|
| Center number | Atom number | Type                                | X         | Y         | Z         |
| 1.            | 8.          | 0.                                  | 0.995833  | -0.244008 | -0.741134 |
| 2.            | 6.          | 0.                                  | 1.932174  | 0.717078  | -0.635315 |
| 3.            | 6.          | 0.                                  | 3.189508  | 0.434752  | -0.213664 |
| 4.            | 6.          | 0.                                  | 3.512132  | -0.916694 | 0.144546  |
| 5.            | 6.          | 0.                                  | 2.565987  | -1.915945 | 0.051413  |
| 6.            | 6.          | 0.                                  | 1.249476  | -1.592399 | -0.423859 |
| 7.            | 6.          | 0.                                  | 1.410720  | 2.092022  | -1.003136 |
| 8.            | 6.          | 0.                                  | 0.764927  | 2.849185  | 0.210189  |
| 9.            | 6.          | 0.                                  | -0.461530 | 2.118990  | 0.755305  |
| 10.           | 6.          | 0.                                  | -1.655868 | 2.200389  | 0.144682  |
| 11.           | 6.          | 0.                                  | -2.939406 | 1.481925  | 0.531411  |
| 12.           | 6.          | 0.                                  | -2.940169 | 0.090987  | -0.069827 |
| 13.           | 6.          | 0.                                  | -3.199200 | -1.080915 | 0.526110  |
| 14.           | 6.          | 0.                                  | -3.113550 | -2.378759 | -0.285157 |
| 15.           | 6.          | 0.                                  | -4.501809 | -2.908612 | -0.660828 |
| 16.           | 8.          | 0.                                  | -2.393640 | -2.238064 | -1.495049 |
| 17.           | 6.          | 0.                                  | -3.591258 | -1.257909 | 1.972269  |
| 18.           | 6.          | 0.                                  | -4.166125 | 2.288723  | 0.058027  |
| 19.           | 6.          | 0.                                  | -0.219180 | 1.305544  | 2.004698  |

|     |    |    |           |           |           |
|-----|----|----|-----------|-----------|-----------|
| 20. | 6. | 0. | 0.501562  | 4.308372  | -0.196569 |
| 21. | 8. | 0. | 0.548360  | 2.022539  | -2.117501 |
| 22. | 8. | 0. | 0.325664  | -2.373613 | -0.579413 |
| 23. | 6. | 0. | 2.826180  | -3.355100 | 0.398864  |
| 24. | 8. | 0. | 4.743575  | -1.268683 | 0.581139  |
| 25. | 6. | 0. | 5.767094  | -0.282326 | 0.687984  |
| 26. | 1. | 0. | 3.917148  | 1.232085  | -0.156829 |
| 27. | 1. | 0. | 2.272976  | 2.685340  | -1.328070 |
| 28. | 1. | 0. | 1.526499  | 2.854591  | 1.001788  |
| 29. | 1. | 0. | -1.737079 | 2.825328  | -0.744437 |
| 30. | 1. | 0. | -2.992240 | 1.411038  | 1.622771  |
| 31. | 1. | 0. | -2.682840 | 0.042600  | -1.127245 |
| 32. | 1. | 0. | -2.622827 | -3.130451 | 0.359081  |
| 33. | 1. | 0. | -4.999584 | -2.192227 | -1.321481 |
| 34. | 1. | 0. | -5.130205 | -3.064290 | 0.221292  |
| 35. | 1. | 0. | -4.404507 | -3.859658 | -1.191846 |
| 36. | 1. | 0. | -1.450715 | -2.158212 | -1.261047 |
| 37. | 1. | 0. | -4.605005 | -1.668269 | 2.062357  |
| 38. | 1. | 0. | -3.570434 | -0.323645 | 2.537963  |
| 39. | 1. | 0. | -2.923872 | -1.971521 | 2.472909  |
| 40. | 1. | 0. | -5.094072 | 1.799870  | 0.367862  |
| 41. | 1. | 0. | -4.153917 | 3.304168  | 0.469893  |
| 42. | 1. | 0. | -4.181588 | 2.368610  | -1.034998 |
| 43. | 1. | 0. | -0.017000 | 1.965995  | 2.859189  |
| 44. | 1. | 0. | 0.663890  | 0.665737  | 1.894765  |
| 45. | 1. | 0. | -1.060295 | 0.661309  | 2.261114  |
| 46. | 1. | 0. | 1.441707  | 4.816334  | -0.439475 |
| 47. | 1. | 0. | -0.138868 | 4.365466  | -1.079379 |
| 48. | 1. | 0. | 0.018211  | 4.854118  | 0.618065  |
| 49. | 1. | 0. | -0.201704 | 1.465298  | -1.855971 |
| 50. | 1. | 0. | 2.679932  | -3.995552 | -0.477509 |
| 51. | 1. | 0. | 3.840928  | -3.491793 | 0.771780  |
| 52. | 1. | 0. | 2.117152  | -3.700800 | 1.158259  |
| 53. | 1. | 0. | 5.498207  | 0.501447  | 1.405057  |
| 54. | 1. | 0. | 5.994406  | 0.168816  | -0.284261 |
| 55. | 1. | 0. | 6.647366  | -0.812933 | 1.051211  |

Conformer 1-4

|             |                                     |
|-------------|-------------------------------------|
| <b>1 -4</b> | Standard Orientation<br>(Ångstroms) |
|-------------|-------------------------------------|



| Center number | Atom number | Type | X         | Y         | Z         |
|---------------|-------------|------|-----------|-----------|-----------|
| 1.            | 8.          | 0.   | 0.995791  | -0.243995 | -0.740791 |
| 2.            | 6.          | 0.   | 1.932229  | 0.717049  | -0.635331 |
| 3.            | 6.          | 0.   | 3.189636  | 0.434687  | -0.213939 |
| 4.            | 6.          | 0.   | 3.512241  | -0.916747 | 0.144339  |
| 5.            | 6.          | 0.   | 2.565932  | -1.915886 | 0.051763  |
| 6.            | 6.          | 0.   | 1.249432  | -1.592334 | -0.423583 |
| 7.            | 6.          | 0.   | 1.410761  | 2.091942  | -1.003292 |
| 8.            | 6.          | 0.   | 0.764976  | 2.849244  | 0.209974  |
| 9.            | 6.          | 0.   | -0.461372 | 2.118977  | 0.755216  |
| 10.           | 6.          | 0.   | -1.655835 | 2.200383  | 0.144835  |
| 11.           | 6.          | 0.   | -2.939225 | 1.481810  | 0.531821  |
| 12.           | 6.          | 0.   | -2.940173 | 0.090979  | -0.069700 |
| 13.           | 6.          | 0.   | -3.199255 | -1.081003 | 0.526070  |
| 14.           | 6.          | 0.   | -3.114015 | -2.378699 | -0.285486 |
| 15.           | 6.          | 0.   | -4.502466 | -2.907674 | -0.661690 |
| 16.           | 8.          | 0.   | -2.393715 | -2.238099 | -1.495138 |
| 17.           | 6.          | 0.   | -3.590923 | -1.258239 | 1.972297  |
| 18.           | 6.          | 0.   | -4.166130 | 2.288674  | 0.059047  |
| 19.           | 6.          | 0.   | -0.218844 | 1.305453  | 2.004547  |
| 20.           | 6.          | 0.   | 0.501512  | 4.308354  | -0.196973 |
| 21.           | 8.          | 0.   | 0.548323  | 2.022253  | -2.117575 |
| 22.           | 8.          | 0.   | 0.325593  | -2.373551 | -0.579053 |
| 23.           | 6.          | 0.   | 2.826131  | -3.354997 | 0.399386  |
| 24.           | 8.          | 0.   | 4.743837  | -1.268862 | 0.580388  |
| 25.           | 6.          | 0.   | 5.767142  | -0.282375 | 0.688063  |
| 26.           | 1.          | 0.   | 3.917399  | 1.231942  | -0.157567 |
| 27.           | 1.          | 0.   | 2.272979  | 2.685254  | -1.328346 |
| 28.           | 1.          | 0.   | 1.526578  | 2.854812  | 1.001541  |
| 29.           | 1.          | 0.   | -1.737302 | 2.825422  | -0.744191 |
| 30.           | 1.          | 0.   | -2.991666 | 1.410670  | 1.623178  |
| 31.           | 1.          | 0.   | -2.682991 | 0.042767  | -1.127163 |
| 32.           | 1.          | 0.   | -2.623900 | -3.130835 | 0.358705  |
| 33.           | 1.          | 0.   | -4.999616 | -2.190860 | -1.322346 |
| 34.           | 1.          | 0.   | -5.131220 | -3.063158 | 0.220210  |
| 35.           | 1.          | 0.   | -4.405577 | -3.858677 | -1.192863 |
| 36.           | 1.          | 0.   | -1.450862 | -2.158172 | -1.260866 |
| 37.           | 1.          | 0.   | -4.604316 | -1.669420 | 2.062572  |
| 38.           | 1.          | 0.   | -3.570735 | -0.323938 | 2.537949  |
| 39.           | 1.          | 0.   | -2.922881 | -1.971312 | 2.472838  |
| 40.           | 1.          | 0.   | -5.093950 | 1.799710  | 0.369089  |
| 41.           | 1.          | 0.   | -4.153812 | 3.304021  | 0.471149  |

|     |    |    |           |           |           |
|-----|----|----|-----------|-----------|-----------|
| 42. | 1. | 0. | -4.181981 | 2.368819  | -1.033954 |
| 43. | 1. | 0. | -0.018530 | 1.965919  | 2.859472  |
| 44. | 1. | 0. | 0.665371  | 0.667150  | 1.895192  |
| 45. | 1. | 0. | -1.059163 | 0.659775  | 2.259957  |
| 46. | 1. | 0. | 1.441629  | 4.816326  | -0.439962 |
| 47. | 1. | 0. | -0.138924 | 4.365312  | -1.079785 |
| 48. | 1. | 0. | 0.018154  | 4.854185  | 0.617601  |
| 49. | 1. | 0. | -0.201883 | 1.465328  | -1.855766 |
| 50. | 1. | 0. | 2.689586  | -3.994709 | -0.479163 |
| 51. | 1. | 0. | 3.837766  | -3.490046 | 0.781274  |
| 52. | 1. | 0. | 2.110727  | -3.703118 | 1.151565  |
| 53. | 1. | 0. | 5.497839  | 0.501053  | 1.405361  |
| 54. | 1. | 0. | 5.994772  | 0.169217  | -0.283898 |
| 55. | 1. | 0. | 6.647371  | -0.812988 | 1.051386  |

### Conformer 1-5

| 1-5           |             | Standard Orientation<br>(Ångstroms) |           |           |           |
|---------------|-------------|-------------------------------------|-----------|-----------|-----------|
| Center number | Atom number | Type                                | X         | Y         | Z         |
| 1.            | 8.          | 0.                                  | 0.873459  | 0.208998  | -0.972157 |
| 2.            | 6.          | 0.                                  | 1.898070  | -0.621750 | -0.703009 |
| 3.            | 6.          | 0.                                  | 3.037821  | -0.184821 | -0.112910 |
| 4.            | 6.          | 0.                                  | 3.141960  | 1.200211  | 0.243167  |
| 5.            | 6.          | 0.                                  | 2.108829  | 2.073788  | -0.019098 |
| 6.            | 6.          | 0.                                  | 0.911614  | 1.579694  | -0.644549 |
| 7.            | 6.          | 0.                                  | 1.644109  | -2.045952 | -1.148956 |
| 8.            | 6.          | 0.                                  | 0.747689  | -2.875329 | -0.177224 |
| 9.            | 6.          | 0.                                  | -0.707557 | -2.415629 | -0.196406 |
| 10.           | 6.          | 0.                                  | -1.337097 | -1.988253 | 0.908713  |
| 11.           | 6.          | 0.                                  | -2.780077 | -1.532004 | 1.030895  |
| 12.           | 6.          | 0.                                  | -2.865939 | -0.026691 | 0.867575  |
| 13.           | 6.          | 0.                                  | -3.566705 | 0.671872  | -0.037774 |
| 14.           | 6.          | 0.                                  | -3.518366 | 2.198924  | -0.114489 |
| 15.           | 6.          | 0.                                  | -2.861399 | 2.920134  | 1.063293  |
| 16.           | 8.          | 0.                                  | -2.929017 | 2.602286  | -1.352636 |
| 17.           | 6.          | 0.                                  | -4.443901 | 0.073378  | -1.111226 |
| 18.           | 6.          | 0.                                  | -3.361404 | -1.962823 | 2.393700  |
| 19.           | 6.          | 0.                                  | -1.383047 | -2.496034 | -1.548996 |
| 20.           | 6.          | 0.                                  | 1.391997  | -3.006541 | 1.206674  |
| 21.           | 8.          | 0.                                  | 2.871778  | -2.757539 | -1.274596 |

|     |    |    |           |           |           |
|-----|----|----|-----------|-----------|-----------|
| 22. | 8. | 0. | -0.072844 | 2.238782  | -0.929021 |
| 23. | 6. | 0. | 2.144092  | 3.539117  | 0.313962  |
| 24. | 8. | 0. | 4.245911  | 1.705044  | 0.842045  |
| 25. | 6. | 0. | 5.345172  | 0.846552  | 1.137125  |
| 26. | 1. | 0. | 3.823932  | -0.900512 | 0.074885  |
| 27. | 1. | 0. | 1.130645  | -1.989291 | -2.118414 |
| 28. | 1. | 0. | 0.764034  | -3.874542 | -0.638091 |
| 29. | 1. | 0. | -0.772792 | -1.930294 | 1.837749  |
| 30. | 1. | 0. | -3.375210 | -2.012825 | 0.250205  |
| 31. | 1. | 0. | -2.268029 | 0.523942  | 1.592652  |
| 32. | 1. | 0. | -4.558876 | 2.548638  | -0.183866 |
| 33. | 1. | 0. | -1.799920 | 2.666357  | 1.139681  |
| 34. | 1. | 0. | -3.350994 | 2.678164  | 2.012379  |
| 35. | 1. | 0. | -2.932055 | 3.998758  | 0.899287  |
| 36. | 1. | 0. | -1.988532 | 2.354071  | -1.311286 |
| 37. | 1. | 0. | -4.377674 | -1.013633 | -1.181668 |
| 38. | 1. | 0. | -4.173830 | 0.505713  | -2.079670 |
| 39. | 1. | 0. | -5.496678 | 0.331604  | -0.933181 |
| 40. | 1. | 0. | -4.412420 | -1.670758 | 2.477285  |
| 41. | 1. | 0. | -3.291020 | -3.047972 | 2.526831  |
| 42. | 1. | 0. | -2.817308 | -1.488095 | 3.218883  |
| 43. | 1. | 0. | -2.459723 | -2.656399 | -1.464428 |
| 44. | 1. | 0. | -1.243670 | -1.568049 | -2.116855 |
| 45. | 1. | 0. | -0.974187 | -3.316581 | -2.150138 |
| 46. | 1. | 0. | 2.405274  | -3.402877 | 1.109914  |
| 47. | 1. | 0. | 1.451330  | -2.046661 | 1.728570  |
| 48. | 1. | 0. | 0.813612  | -3.693564 | 1.830150  |
| 49. | 1. | 0. | 3.376372  | -2.354828 | -1.994046 |
| 50. | 1. | 0. | 1.419322  | 3.778032  | 1.100697  |
| 51. | 1. | 0. | 3.135641  | 3.840974  | 0.651181  |
| 52. | 1. | 0. | 1.861978  | 4.134427  | -0.559612 |
| 53. | 1. | 0. | 5.771180  | 0.409427  | 0.227076  |
| 54. | 1. | 0. | 5.057783  | 0.047219  | 1.828970  |
| 55. | 1. | 0. | 6.092355  | 1.481949  | 1.612982  |

Conformer 1-6

| 1-6           |             | Standard Orientation<br>(Ångstroms) |          |           |           |
|---------------|-------------|-------------------------------------|----------|-----------|-----------|
| Center number | Atom number | Type                                | X        | Y         | Z         |
| 1.            | 8.          | 0.                                  | 0.890952 | 0.172725  | -0.878683 |
| 2.            | 6.          | 0.                                  | 1.933787 | -0.651350 | -0.661893 |

|     |    |    |           |           |           |
|-----|----|----|-----------|-----------|-----------|
| 3.  | 6. | 0. | 3.097666  | -0.212093 | -0.127009 |
| 4.  | 6. | 0. | 3.212926  | 1.174250  | 0.218590  |
| 5.  | 6. | 0. | 2.162275  | 2.042542  | 0.011988  |
| 6.  | 6. | 0. | 0.939903  | 1.543372  | -0.555973 |
| 7.  | 6. | 0. | 1.654199  | -2.068441 | -1.094635 |
| 8.  | 6. | 0. | 0.702869  | -2.858048 | -0.130390 |
| 9.  | 6. | 0. | -0.747991 | -2.390362 | -0.202023 |
| 10. | 6. | 0. | -1.419229 | -1.980502 | 0.885130  |
| 11. | 6. | 0. | -2.863340 | -1.518315 | 0.960564  |
| 12. | 6. | 0. | -2.931331 | -0.009103 | 0.830064  |
| 13. | 6. | 0. | -3.594383 | 0.715899  | -0.082615 |
| 14. | 6. | 0. | -3.523137 | 2.243367  | -0.126336 |
| 15. | 6. | 0. | -2.900629 | 2.931145  | 1.089473  |
| 16. | 8. | 0. | -2.880396 | 2.660377  | -1.332868 |
| 17. | 6. | 0. | -4.440151 | 0.150416  | -1.198141 |
| 18. | 6. | 0. | -3.499738 | -1.977715 | 2.289026  |
| 19. | 6. | 0. | -1.368431 | -2.445985 | -1.581154 |
| 20. | 6. | 0. | 1.305093  | -2.964041 | 1.274131  |
| 21. | 8. | 0. | 2.919444  | -2.714549 | -1.201556 |
| 22. | 8. | 0. | -0.059858 | 2.198715  | -0.794507 |
| 23. | 6. | 0. | 2.207468  | 3.508650  | 0.340663  |
| 24. | 8. | 0. | 4.344778  | 1.685515  | 0.756433  |
| 25. | 6. | 0. | 5.472545  | 0.838218  | 0.965088  |
| 26. | 1. | 0. | 3.901301  | -0.920092 | 0.000910  |
| 27. | 1. | 0. | 1.173887  | -2.009470 | -2.081425 |
| 28. | 1. | 0. | 0.702238  | -3.875159 | -0.563342 |
| 29. | 1. | 0. | -0.891570 | -1.940108 | 1.836230  |
| 30. | 1. | 0. | -3.429963 | -1.976141 | 0.145593  |
| 31. | 1. | 0. | -2.351945 | 0.519532  | 1.585654  |
| 32. | 1. | 0. | -4.555166 | 2.609811  | -0.228419 |
| 33. | 1. | 0. | -1.846127 | 2.660982  | 1.198438  |
| 34. | 1. | 0. | -3.428137 | 2.676635  | 2.014734  |
| 35. | 1. | 0. | -2.951285 | 4.013787  | 0.945694  |
| 36. | 1. | 0. | -1.947458 | 2.391201  | -1.260896 |
| 37. | 1. | 0. | -4.129191 | 0.597322  | -2.147546 |
| 38. | 1. | 0. | -5.495078 | 0.420107  | -1.053098 |
| 39. | 1. | 0. | -4.386411 | -0.935992 | -1.287393 |
| 40. | 1. | 0. | -4.551431 | -1.680531 | 2.338313  |
| 41. | 1. | 0. | -3.441197 | -3.066195 | 2.399327  |
| 42. | 1. | 0. | -2.985705 | -1.525833 | 3.145673  |
| 43. | 1. | 0. | -1.172281 | -1.522292 | -2.138826 |
| 44. | 1. | 0. | -0.963925 | -3.278649 | -2.169407 |
| 45. | 1. | 0. | -2.452242 | -2.569500 | -1.541797 |

|     |    |    |          |           |           |
|-----|----|----|----------|-----------|-----------|
| 46. | 1. | 0. | 2.331162 | -3.335236 | 1.214382  |
| 47. | 1. | 0. | 1.331061 | -1.994383 | 1.779628  |
| 48. | 1. | 0. | 0.724276 | -3.653225 | 1.892544  |
| 49. | 1. | 0. | 2.753988 | -3.645950 | -1.396686 |
| 50. | 1. | 0. | 1.906228 | 4.103227  | -0.527259 |
| 51. | 1. | 0. | 1.501345 | 3.750195  | 1.143265  |
| 52. | 1. | 0. | 3.207297 | 3.809662  | 0.653175  |
| 53. | 1. | 0. | 6.244937 | 1.480066  | 1.389396  |
| 54. | 1. | 0. | 5.834596 | 0.410386  | 0.023844  |
| 55. | 1. | 0. | 5.245221 | 0.032163  | 1.671466  |

Conformer 1-7

| 1-7           |             | Standard Orientation<br>(Ångstroms) |           |           |           |
|---------------|-------------|-------------------------------------|-----------|-----------|-----------|
| Center number | Atom number | Type                                | X         | Y         | Z         |
| 1.            | 8.          | 0.                                  | 1.042786  | 0.099797  | -1.332838 |
| 2.            | 6.          | 0.                                  | 2.134781  | -0.393129 | -0.721825 |
| 3.            | 6.          | 0.                                  | 2.936460  | 0.386535  | 0.044481  |
| 4.            | 6.          | 0.                                  | 2.572908  | 1.760165  | 0.241474  |
| 5.            | 6.          | 0.                                  | 1.434919  | 2.279764  | -0.340098 |
| 6.            | 6.          | 0.                                  | 0.623088  | 1.432258  | -1.169043 |
| 7.            | 6.          | 0.                                  | 2.329728  | -1.870707 | -0.982233 |
| 8.            | 6.          | 0.                                  | 1.511201  | -2.782359 | -0.011709 |
| 9.            | 6.          | 0.                                  | 0.005062  | -2.571801 | -0.166812 |
| 10.           | 6.          | 0.                                  | -0.746856 | -2.088205 | 0.833684  |
| 11.           | 6.          | 0.                                  | -2.240563 | -1.830420 | 0.848339  |
| 12.           | 6.          | 0.                                  | -2.527175 | -0.359493 | 0.606352  |
| 13.           | 6.          | 0.                                  | -3.504368 | 0.177733  | -0.136845 |
| 14.           | 6.          | 0.                                  | -3.652205 | 1.699582  | -0.233291 |
| 15.           | 6.          | 0.                                  | -4.728797 | 2.225713  | 0.721446  |
| 16.           | 8.          | 0.                                  | -2.462852 | 2.407427  | 0.073681  |
| 17.           | 6.          | 0.                                  | -4.533109 | -0.602735 | -0.917110 |
| 18.           | 6.          | 0.                                  | -2.836151 | -2.282884 | 2.201051  |
| 19.           | 6.          | 0.                                  | -0.554511 | -2.936679 | -1.524760 |
| 20.           | 6.          | 0.                                  | 2.049983  | -2.699543 | 1.421050  |
| 21.           | 8.          | 0.                                  | 3.697462  | -2.239201 | -0.842636 |
| 22.           | 8.          | 0.                                  | -0.398270 | 1.746498  | -1.760106 |
| 23.           | 6.          | 0.                                  | 0.967910  | 3.697650  | -0.159187 |
| 24.           | 8.          | 0.                                  | 3.316392  | 2.594283  | 1.005048  |
| 25.           | 6.          | 0.                                  | 4.485047  | 2.103201  | 1.656957  |
| 26.           | 1.          | 0.                                  | 3.806977  | -0.062708 | 0.498459  |

|     |    |    |           |           |           |
|-----|----|----|-----------|-----------|-----------|
| 27. | 1. | 0. | 1.977207  | -2.063379 | -2.004739 |
| 28. | 1. | 0. | 1.730656  | -3.795529 | -0.380256 |
| 29. | 1. | 0. | -0.252046 | -1.821650 | 1.766189  |
| 30. | 1. | 0. | -2.716647 | -2.424002 | 0.062220  |
| 31. | 1. | 0. | -1.862450 | 0.338613  | 1.113282  |
| 32. | 1. | 0. | -3.970006 | 1.931171  | -1.266116 |
| 33. | 1. | 0. | -4.423609 | 2.036890  | 1.755103  |
| 34. | 1. | 0. | -5.694062 | 1.740080  | 0.549436  |
| 35. | 1. | 0. | -4.852577 | 3.304175  | 0.586835  |
| 36. | 1. | 0. | -1.812205 | 2.207262  | -0.624311 |
| 37. | 1. | 0. | -4.468466 | -0.366922 | -1.987485 |
| 38. | 1. | 0. | -5.551925 | -0.341429 | -0.604050 |
| 39. | 1. | 0. | -4.426370 | -1.683421 | -0.804117 |
| 40. | 1. | 0. | -3.920781 | -2.140660 | 2.213189  |
| 41. | 1. | 0. | -2.620517 | -3.339947 | 2.393035  |
| 42. | 1. | 0. | -2.415569 | -1.697215 | 3.026540  |
| 43. | 1. | 0. | -0.425438 | -2.113208 | -2.237345 |
| 44. | 1. | 0. | -0.046188 | -3.815335 | -1.939829 |
| 45. | 1. | 0. | -1.622647 | -3.159517 | -1.487142 |
| 46. | 1. | 0. | 3.111520  | -2.954210 | 1.435694  |
| 47. | 1. | 0. | 1.936487  | -1.699035 | 1.848742  |
| 48. | 1. | 0. | 1.516343  | -3.403504 | 2.065116  |
| 49. | 1. | 0. | 4.197641  | -1.793020 | -1.539088 |
| 50. | 1. | 0. | -0.017808 | 3.718067  | 0.318783  |
| 51. | 1. | 0. | 1.668958  | 4.266230  | 0.451486  |
| 52. | 1. | 0. | 0.857323  | 4.192159  | -1.129900 |
| 53. | 1. | 0. | 4.245379  | 1.298980  | 2.361265  |
| 54. | 1. | 0. | 4.891648  | 2.952497  | 2.206352  |
| 55. | 1. | 0. | 5.230927  | 1.750253  | 0.935937  |

### Conformer 1-8

| 1-8           |             | Standard Orientation<br>(Ångstroms) |           |           |           |
|---------------|-------------|-------------------------------------|-----------|-----------|-----------|
| Center number | Atom number | Type                                | X         | Y         | Z         |
| 1.            | 8.          | 0.                                  | -2.700215 | 1.164233  | -0.417989 |
| 2.            | 6.          | 0.                                  | -2.229748 | 0.437573  | 0.613717  |
| 3.            | 6.          | 0.                                  | -1.096626 | 0.786961  | 1.266040  |
| 4.            | 6.          | 0.                                  | -0.356654 | 1.914837  | 0.786365  |
| 5.            | 6.          | 0.                                  | -0.791353 | 2.668116  | -0.277252 |
| 6.            | 6.          | 0.                                  | -2.034266 | 2.320429  | -0.927571 |
| 7.            | 6.          | 0.                                  | -3.059358 | -0.794212 | 0.889515  |

|     |    |    |           |           |           |
|-----|----|----|-----------|-----------|-----------|
| 8.  | 6. | 0. | -2.694869 | -2.010154 | -0.039839 |
| 9.  | 6. | 0. | -1.247464 | -2.456084 | 0.169850  |
| 10. | 6. | 0. | -0.260908 | -2.027624 | -0.632270 |
| 11. | 6. | 0. | 1.221776  | -2.326322 | -0.581476 |
| 12. | 6. | 0. | 2.008157  | -1.029713 | -0.557930 |
| 13. | 6. | 0. | 3.128917  | -0.748731 | 0.123583  |
| 14. | 6. | 0. | 3.825015  | 0.603400  | -0.062695 |
| 15. | 6. | 0. | 5.064775  | 0.486974  | -0.954554 |
| 16. | 8. | 0. | 3.001757  | 1.595408  | -0.659476 |
| 17. | 6. | 0. | 3.835404  | -1.700486 | 1.059544  |
| 18. | 6. | 0. | 1.628660  | -3.168046 | -1.817473 |
| 19. | 6. | 0. | -1.046729 | -3.380180 | 1.349336  |
| 20. | 6. | 0. | -3.102512 | -1.771723 | -1.500795 |
| 21. | 8. | 0. | -4.446040 | -0.500511 | 0.838926  |
| 22. | 8. | 0. | -2.577971 | 2.882568  | -1.849885 |
| 23. | 6. | 0. | -0.017411 | 3.842043  | -0.813634 |
| 24. | 8. | 0. | 0.836536  | 2.276550  | 1.342861  |
| 25. | 6. | 0. | 1.257709  | 1.651552  | 2.560170  |
| 26. | 1. | 0. | -0.746154 | 0.176217  | 2.084416  |
| 27. | 1. | 0. | -2.853779 | -1.095425 | 1.921887  |
| 28. | 1. | 0. | -3.342214 | -2.811624 | 0.341611  |
| 29. | 1. | 0. | -0.532095 | -1.373004 | -1.460348 |
| 30. | 1. | 0. | 1.454494  | -2.916056 | 0.309762  |
| 31. | 1. | 0. | 1.637317  | -0.248165 | -1.220159 |
| 32. | 1. | 0. | 4.158109  | 0.943454  | 0.935746  |
| 33. | 1. | 0. | 4.764945  | 0.166460  | -1.956567 |
| 34. | 1. | 0. | 5.781133  | -0.236651 | -0.555379 |
| 35. | 1. | 0. | 5.558313  | 1.459457  | -1.033323 |
| 36. | 1. | 0. | 2.296176  | 1.823434  | -0.034302 |
| 37. | 1. | 0. | 3.231746  | -2.576337 | 1.306898  |
| 38. | 1. | 0. | 4.106221  | -1.201525 | 1.999046  |
| 39. | 1. | 0. | 4.773581  | -2.066340 | 0.623571  |
| 40. | 1. | 0. | 2.698342  | -3.398023 | -1.794765 |
| 41. | 1. | 0. | 1.067250  | -4.107435 | -1.848844 |
| 42. | 1. | 0. | 1.423685  | -2.621359 | -2.744255 |
| 43. | 1. | 0. | -1.482520 | -2.961551 | 2.265964  |
| 44. | 1. | 0. | -1.557962 | -4.336615 | 1.179317  |
| 45. | 1. | 0. | 0.003057  | -3.597857 | 1.553790  |
| 46. | 1. | 0. | -4.175677 | -1.570446 | -1.563097 |
| 47. | 1. | 0. | -2.581954 | -0.928868 | -1.961151 |
| 48. | 1. | 0. | -2.895271 | -2.664054 | -2.097950 |
| 49. | 1. | 0. | -4.593989 | 0.051863  | 0.057628  |
| 50. | 1. | 0. | -0.644262 | 4.406977  | -1.504214 |

|     |    |    |          |          |           |
|-----|----|----|----------|----------|-----------|
| 51. | 1. | 0. | 0.313946 | 4.498947 | -0.003969 |
| 52. | 1. | 0. | 0.879209 | 3.514271 | -1.353579 |
| 53. | 1. | 0. | 0.502547 | 1.766519 | 3.344034  |
| 54. | 1. | 0. | 2.167507 | 2.174602 | 2.855695  |
| 55. | 1. | 0. | 1.480670 | 0.591495 | 2.401269  |

Conformer 1-9

| 1-9           |             | Standard Orientation<br>(Ångstroms) |           |           |           |
|---------------|-------------|-------------------------------------|-----------|-----------|-----------|
| Center number | Atom number | Type                                | X         | Y         | Z         |
| 1.            | 8.          | 0.                                  | -0.968130 | 0.349736  | -1.330655 |
| 2.            | 6.          | 0.                                  | -2.091358 | 0.245984  | -0.598493 |
| 3.            | 6.          | 0.                                  | -2.485991 | 1.239711  | 0.232856  |
| 4.            | 6.          | 0.                                  | -1.662773 | 2.409919  | 0.346900  |
| 5.            | 6.          | 0.                                  | -0.494244 | 2.528791  | -0.377682 |
| 6.            | 6.          | 0.                                  | -0.111743 | 1.469030  | -1.266716 |
| 7.            | 6.          | 0.                                  | -2.779540 | -1.087875 | -0.790323 |
| 8.            | 6.          | 0.                                  | -2.324519 | -2.133608 | 0.285739  |
| 9.            | 6.          | 0.                                  | -0.820019 | -2.399883 | 0.310991  |
| 10.           | 6.          | 0.                                  | -0.081898 | -1.831842 | 1.280223  |
| 11.           | 6.          | 0.                                  | 1.416115  | -1.919136 | 1.573024  |
| 12.           | 6.          | 0.                                  | 2.255566  | -1.196678 | 0.535347  |
| 13.           | 6.          | 0.                                  | 3.009182  | -0.098818 | 0.701331  |
| 14.           | 6.          | 0.                                  | 3.846563  | 0.502105  | -0.431212 |
| 15.           | 6.          | 0.                                  | 3.947547  | -0.325999 | -1.712386 |
| 16.           | 8.          | 0.                                  | 3.411611  | 1.833751  | -0.730197 |
| 17.           | 6.          | 0.                                  | 3.141326  | 0.675939  | 1.991149  |
| 18.           | 6.          | 0.                                  | 1.921069  | -3.365560 | 1.784855  |
| 19.           | 6.          | 0.                                  | -0.276576 | -3.323813 | -0.758197 |
| 20.           | 6.          | 0.                                  | -3.163473 | -3.413483 | 0.130090  |
| 21.           | 8.          | 0.                                  | -2.640990 | -1.546271 | -2.125168 |
| 22.           | 8.          | 0.                                  | 0.871549  | 1.423543  | -1.987907 |
| 23.           | 6.          | 0.                                  | 0.420246  | 3.720790  | -0.305011 |
| 24.           | 8.          | 0.                                  | -1.992924 | 3.440124  | 1.158824  |
| 25.           | 6.          | 0.                                  | -3.180934 | 3.374763  | 1.943398  |
| 26.           | 1.          | 0.                                  | -3.403154 | 1.125967  | 0.793351  |
| 27.           | 1.          | 0.                                  | -3.854084 | -0.930131 | -0.632194 |
| 28.           | 1.          | 0.                                  | -2.588020 | -1.674181 | 1.247384  |
| 29.           | 1.          | 0.                                  | -0.621672 | -1.193052 | 1.980020  |
| 30.           | 1.          | 0.                                  | 1.554721  | -1.411742 | 2.532213  |
| 31.           | 1.          | 0.                                  | 2.243927  | -1.658739 | -0.448783 |



|     |    |    |           |           |           |
|-----|----|----|-----------|-----------|-----------|
| 32. | 1. | 0. | 4.862928  | 0.634159  | -0.031565 |
| 33. | 1. | 0. | 2.966825  | -0.435916 | -2.186256 |
| 34. | 1. | 0. | 4.359982  | -1.321957 | -1.522284 |
| 35. | 1. | 0. | 4.602776  | 0.192533  | -2.417370 |
| 36. | 1. | 0. | 2.580489  | 1.753244  | -1.234052 |
| 37. | 1. | 0. | 3.036624  | 1.745379  | 1.784991  |
| 38. | 1. | 0. | 4.140655  | 0.535814  | 2.425488  |
| 39. | 1. | 0. | 2.406850  | 0.395884  | 2.748725  |
| 40. | 1. | 0. | 2.954565  | -3.351941 | 2.145486  |
| 41. | 1. | 0. | 1.304388  | -3.887134 | 2.524289  |
| 42. | 1. | 0. | 1.900995  | -3.950563 | 0.861810  |
| 43. | 1. | 0. | -0.744808 | -3.124698 | -1.725544 |
| 44. | 1. | 0. | 0.802408  | -3.234377 | -0.878512 |
| 45. | 1. | 0. | -0.498173 | -4.372307 | -0.521187 |
| 46. | 1. | 0. | -4.229999 | -3.192730 | 0.248853  |
| 47. | 1. | 0. | -3.028094 | -3.860983 | -0.857083 |
| 48. | 1. | 0. | -2.885303 | -4.150939 | 0.888898  |
| 49. | 1. | 0. | -1.765063 | -1.273482 | -2.435592 |
| 50. | 1. | 0. | 1.436255  | 3.408847  | -0.042663 |
| 51. | 1. | 0. | 0.484705  | 4.217569  | -1.279542 |
| 52. | 1. | 0. | 0.065222  | 4.440665  | 0.431976  |
| 53. | 1. | 0. | -3.215085 | 4.311331  | 2.500150  |
| 54. | 1. | 0. | -3.151825 | 2.537292  | 2.649539  |
| 55. | 1. | 0. | -4.075239 | 3.297101  | 1.314989  |

### Conformer 1-10

| 1-10          |             | Standard Orientation<br>(Ångstroms) |           |           |           |
|---------------|-------------|-------------------------------------|-----------|-----------|-----------|
| Center number | Atom number | Type                                | X         | Y         | Z         |
| 1.            | 8.          | 0.                                  | -0.967796 | 0.351086  | -1.331084 |
| 2.            | 6.          | 0.                                  | -2.090914 | 0.248701  | -0.598589 |
| 3.            | 6.          | 0.                                  | -2.483887 | 1.242779  | 0.233135  |
| 4.            | 6.          | 0.                                  | -1.658989 | 2.411791  | 0.347169  |
| 5.            | 6.          | 0.                                  | -0.490581 | 2.529247  | -0.377868 |
| 6.            | 6.          | 0.                                  | -0.109779 | 1.469073  | -1.267106 |
| 7.            | 6.          | 0.                                  | -2.780958 | -1.084199 | -0.790486 |
| 8.            | 6.          | 0.                                  | -2.327479 | -2.130510 | 0.285679  |
| 9.            | 6.          | 0.                                  | -0.823323 | -2.398723 | 0.311072  |
| 10.           | 6.          | 0.                                  | -0.084586 | -1.831638 | 1.280398  |
| 11.           | 6.          | 0.                                  | 1.413295  | -1.920761 | 1.573294  |
| 12.           | 6.          | 0.                                  | 2.253619  | -1.199489 | 0.535481  |

|     |    |    |           |           |           |
|-----|----|----|-----------|-----------|-----------|
| 13. | 6. | 0. | 3.008769  | -0.102659 | 0.701268  |
| 14. | 6. | 0. | 3.846627  | 0.497121  | -0.431539 |
| 15. | 6. | 0. | 3.945834  | -0.330999 | -1.712824 |
| 16. | 8. | 0. | 3.413464  | 1.829453  | -0.730199 |
| 17. | 6. | 0. | 3.142390  | 0.671881  | 1.991057  |
| 18. | 6. | 0. | 1.916525  | -3.367747 | 1.785435  |
| 19. | 6. | 0. | -0.280942 | -3.323287 | -0.758100 |
| 20. | 6. | 0. | -3.168124 | -3.409269 | 0.129953  |
| 21. | 8. | 0. | -2.642899 | -1.542895 | -2.125250 |
| 22. | 8. | 0. | 0.873344  | 1.422273  | -1.988472 |
| 23. | 6. | 0. | 0.425531  | 3.720009  | -0.305371 |
| 24. | 8. | 0. | -1.987327 | 3.442258  | 1.159524  |
| 25. | 6. | 0. | -3.175382 | 3.378625  | 1.944197  |
| 26. | 1. | 0. | -3.400961 | 1.130140  | 0.794003  |
| 27. | 1. | 0. | -3.855293 | -0.924923 | -0.632447 |
| 28. | 1. | 0. | -2.590464 | -1.670703 | 1.247281  |
| 29. | 1. | 0. | -0.623630 | -1.192197 | 1.980162  |
| 30. | 1. | 0. | 1.552499  | -1.413358 | 2.532394  |
| 31. | 1. | 0. | 2.241140  | -1.661566 | -0.448634 |
| 32. | 1. | 0. | 4.863358  | 0.627621  | -0.032311 |
| 33. | 1. | 0. | 2.964745  | -0.439415 | -2.186278 |
| 34. | 1. | 0. | 4.356893  | -1.327576 | -1.522981 |
| 35. | 1. | 0. | 4.601541  | 0.186618  | -2.418037 |
| 36. | 1. | 0. | 2.582358  | 1.750154  | -1.234283 |
| 37. | 1. | 0. | 3.038514  | 1.741430  | 1.785062  |
| 38. | 1. | 0. | 4.141876  | 0.530838  | 2.424736  |
| 39. | 1. | 0. | 2.408159  | 0.392390  | 2.749078  |
| 40. | 1. | 0. | 2.949971  | -3.355245 | 2.146245  |
| 41. | 1. | 0. | 1.299112  | -3.888500 | 2.524837  |
| 42. | 1. | 0. | 1.895967  | -3.952889 | 0.862487  |
| 43. | 1. | 0. | -0.748337 | -3.123069 | -1.725627 |
| 44. | 1. | 0. | 0.798255  | -3.235692 | -0.877827 |
| 45. | 1. | 0. | -0.504463 | -4.371471 | -0.521528 |
| 46. | 1. | 0. | -4.234356 | -3.187093 | 0.248705  |
| 47. | 1. | 0. | -3.033309 | -3.856887 | -0.857241 |
| 48. | 1. | 0. | -2.890946 | -4.147131 | 0.888730  |
| 49. | 1. | 0. | -1.766814 | -1.270828 | -2.435852 |
| 50. | 1. | 0. | 1.440913  | 3.406873  | -0.041976 |
| 51. | 1. | 0. | 0.491484  | 4.215803  | -1.280297 |
| 52. | 1. | 0. | 0.070923  | 4.440978  | 0.430731  |
| 53. | 1. | 0. | -3.208097 | 4.315262  | 2.500920  |
| 54. | 1. | 0. | -3.147368 | 2.541152  | 2.650379  |
| 55. | 1. | 0. | -4.069847 | 3.302215  | 1.315883  |

Conformer 1-11

| 1-11          |             | Standard Orientation<br>(Ångstroms) |           |           |           |
|---------------|-------------|-------------------------------------|-----------|-----------|-----------|
| Center number | Atom number | Type                                | X         | Y         | Z         |
| 1.            | 8.          | 0.                                  | 0.920360  | -0.405403 | -0.468276 |
| 2.            | 6.          | 0.                                  | 1.722509  | 0.648576  | -0.707230 |
| 3.            | 6.          | 0.                                  | 3.056774  | 0.588188  | -0.474413 |
| 4.            | 6.          | 0.                                  | 3.612695  | -0.622722 | 0.057629  |
| 5.            | 6.          | 0.                                  | 2.808565  | -1.712721 | 0.318018  |
| 6.            | 6.          | 0.                                  | 1.401832  | -1.628706 | 0.039290  |
| 7.            | 6.          | 0.                                  | 0.967892  | 1.862985  | -1.210154 |
| 8.            | 6.          | 0.                                  | 0.470240  | 2.800840  | -0.052962 |
| 9.            | 6.          | 0.                                  | -0.548530 | 2.107296  | 0.849384  |
| 10.           | 6.          | 0.                                  | -1.839238 | 2.000783  | 0.490705  |
| 11.           | 6.          | 0.                                  | -2.949858 | 1.298299  | 1.257390  |
| 12.           | 6.          | 0.                                  | -2.940973 | -0.220004 | 1.065370  |
| 13.           | 6.          | 0.                                  | -3.089250 | -0.936735 | -0.058705 |
| 14.           | 6.          | 0.                                  | -3.036350 | -2.462584 | 0.013744  |
| 15.           | 6.          | 0.                                  | -4.361676 | -3.121966 | -0.373484 |
| 16.           | 8.          | 0.                                  | -2.050371 | -2.986519 | -0.866830 |
| 17.           | 6.          | 0.                                  | -3.286827 | -0.374232 | -1.445650 |
| 18.           | 6.          | 0.                                  | -4.321643 | 1.930099  | 0.944763  |
| 19.           | 6.          | 0.                                  | 0.009440  | 1.554195  | 2.139594  |
| 20.           | 6.          | 0.                                  | -0.024440 | 4.120679  | -0.667350 |
| 21.           | 8.          | 0.                                  | -0.072026 | 1.487740  | -2.085861 |
| 22.           | 8.          | 0.                                  | 0.579485  | -2.514535 | 0.200513  |
| 23.           | 6.          | 0.                                  | 3.313582  | -3.018752 | 0.864768  |
| 24.           | 8.          | 0.                                  | 4.933538  | -0.750278 | 0.322018  |
| 25.           | 6.          | 0.                                  | 5.818883  | 0.334444  | 0.054292  |
| 26.           | 1.          | 0.                                  | 3.668744  | 1.451879  | -0.693057 |
| 27.           | 1.          | 0.                                  | 1.671160  | 2.448404  | -1.813688 |
| 28.           | 1.          | 0.                                  | 1.355975  | 3.025775  | 0.556801  |
| 29.           | 1.          | 0.                                  | -2.146108 | 2.464927  | -0.444542 |
| 30.           | 1.          | 0.                                  | -2.769611 | 1.466206  | 2.325614  |
| 31.           | 1.          | 0.                                  | -2.792774 | -0.786155 | 1.985445  |
| 32.           | 1.          | 0.                                  | -2.806433 | -2.740739 | 1.054841  |
| 33.           | 1.          | 0.                                  | -4.615850 | -2.901235 | -1.414500 |
| 34.           | 1.          | 0.                                  | -5.176006 | -2.772636 | 0.268813  |
| 35.           | 1.          | 0.                                  | -4.272114 | -4.207582 | -0.275602 |

|     |    |    |           |           |           |
|-----|----|----|-----------|-----------|-----------|
| 36. | 1. | 0. | -1.173314 | -2.740163 | -0.519777 |
| 37. | 1. | 0. | -3.052526 | 0.689074  | -1.517755 |
| 38. | 1. | 0. | -4.323156 | -0.503364 | -1.782519 |
| 39. | 1. | 0. | -2.656752 | -0.926740 | -2.150177 |
| 40. | 1. | 0. | -5.110547 | 1.450329  | 1.531453  |
| 41. | 1. | 0. | -4.320274 | 2.999838  | 1.182345  |
| 42. | 1. | 0. | -4.581757 | 1.820183  | -0.112276 |
| 43. | 1. | 0. | 0.387215  | 2.369115  | 2.772063  |
| 44. | 1. | 0. | 0.859378  | 0.887339  | 1.955558  |
| 45. | 1. | 0. | -0.726658 | 0.991020  | 2.714355  |
| 46. | 1. | 0. | 0.796378  | 4.641708  | -1.172861 |
| 47. | 1. | 0. | -0.805456 | 3.942441  | -1.409863 |
| 48. | 1. | 0. | -0.424755 | 4.781190  | 0.106241  |
| 49. | 1. | 0. | -0.662815 | 0.899491  | -1.589809 |
| 50. | 1. | 0. | 3.049644  | -3.842076 | 0.193165  |
| 51. | 1. | 0. | 4.395229  | -2.997784 | 0.995470  |
| 52. | 1. | 0. | 2.844163  | -3.241530 | 1.829065  |
| 53. | 1. | 0. | 5.565332  | 1.218247  | 0.650552  |
| 54. | 1. | 0. | 5.824872  | 0.596159  | -1.009654 |
| 55. | 1. | 0. | 6.809167  | -0.019130 | 0.341795  |

**Table S3.** Gibbs free energies<sup>a</sup> and equilibrium populations<sup>b</sup> of low-energy conformers of cytospomarin (**2**)

| Conformers | In MeOH          |                      |
|------------|------------------|----------------------|
|            | $G^a$            | $P$ (%) <sup>b</sup> |
| <b>2-1</b> | -599254.34919792 | 11.53                |
| <b>2-2</b> | -599254.5926718  | 17.39                |
| <b>2-3</b> | -599254.13145195 | 7.98                 |
| <b>2-4</b> | -599254.68177822 | 20.22                |
| <b>2-5</b> | -599253.19520703 | 1.64                 |
| <b>2-6</b> | -599254.72884147 | 21.89                |
| <b>2-7</b> | -599254.6554228  | 19.34                |

<sup>a</sup>B3LYP/6-31G(d,p), in kcal/mol. <sup>b</sup>From  $G$  values at 298.15K.

**Table S4.** Cartesian coordinates for the low-energy reoptimized MMFF conformers of cytospomarin (**2**) at B3LYP/6-31G(d,p) level of theory in gas

Conformer **2-1**

| <b>2-1</b> |      | Standard Orientation<br>(Ångstroms) |           |           |           |
|------------|------|-------------------------------------|-----------|-----------|-----------|
| No.        | Atom | Type                                | X         | Y         | Z         |
| 1.         | 6.   | 0.                                  | -3.299084 | 0.862809  | 0.197751  |
| 2.         | 6.   | 0.                                  | -3.165693 | -0.505707 | -0.039249 |
| 3.         | 6.   | 0.                                  | -1.906543 | -1.090102 | -0.271458 |

|     |    |    |           |           |           |
|-----|----|----|-----------|-----------|-----------|
| 4.  | 6. | 0. | -0.762265 | -0.296083 | -0.311974 |
| 5.  | 6. | 0. | -0.886472 | 1.099096  | -0.064602 |
| 6.  | 6. | 0. | -2.162893 | 1.673068  | 0.200317  |
| 7.  | 6. | 0. | 0.552173  | -0.811693 | -0.605633 |
| 8.  | 6. | 0. | 1.617871  | 0.012279  | -0.617353 |
| 9.  | 8. | 0. | 1.496522  | 1.354960  | -0.351341 |
| 10. | 6. | 0. | 0.281362  | 1.944947  | -0.076026 |
| 11. | 6. | 0. | 3.037622  | -0.362971 | -0.906492 |
| 12. | 6. | 0. | 3.970640  | -0.201353 | 0.304045  |
| 13. | 8. | 0. | 3.499593  | -1.120947 | 1.290228  |
| 14. | 6. | 0. | 5.428422  | -0.477193 | -0.064162 |
| 15. | 8. | 0. | 0.290969  | 3.155519  | 0.138284  |
| 16. | 8. | 0. | -2.305937 | 2.983188  | 0.442406  |
| 17. | 8. | 0. | -4.267759 | -1.290144 | -0.051477 |
| 18. | 8. | 0. | -1.880067 | -2.461286 | -0.500298 |
| 19. | 6. | 0. | -1.550169 | -3.238427 | 0.664512  |
| 20. | 1. | 0. | -4.275882 | 1.294818  | 0.376803  |
| 21. | 1. | 0. | 0.685848  | -1.860599 | -0.833713 |
| 22. | 1. | 0. | 3.069752  | -1.405156 | -1.238630 |
| 23. | 1. | 0. | 3.412919  | 0.265254  | -1.723450 |
| 24. | 1. | 0. | 3.877194  | 0.831560  | 0.672042  |
| 25. | 1. | 0. | 4.007777  | -0.972956 | 2.098309  |
| 26. | 1. | 0. | 5.539639  | -1.494693 | -0.452560 |
| 27. | 1. | 0. | 6.073393  | -0.378023 | 0.816142  |
| 28. | 1. | 0. | 5.789216  | 0.228865  | -0.819369 |
| 29. | 1. | 0. | -1.402585 | 3.384655  | 0.396049  |
| 30. | 1. | 0. | -3.970488 | -2.167763 | -0.348015 |
| 31. | 1. | 0. | -2.272419 | -3.066470 | 1.471500  |
| 32. | 1. | 0. | -0.545812 | -2.996317 | 1.027387  |
| 33. | 1. | 0. | -1.584950 | -4.285505 | 0.357024  |

Conformer 2-2

| 2-2 |      | Standard Orientation<br>(Ångstroms) |           |           |           |
|-----|------|-------------------------------------|-----------|-----------|-----------|
| No. | Atom | Type                                | X         | Y         | Z         |
| 1.  | 6.   | 0.                                  | -3.309072 | 0.744343  | 0.222202  |
| 2.  | 6.   | 0.                                  | -3.105855 | -0.610772 | -0.037784 |
| 3.  | 6.   | 0.                                  | -1.817989 | -1.124457 | -0.285589 |
| 4.  | 6.   | 0.                                  | -0.719210 | -0.269460 | -0.320456 |
| 5.  | 6.   | 0.                                  | -0.914821 | 1.114031  | -0.054150 |
| 6.  | 6.   | 0.                                  | -2.218022 | 1.615164  | 0.227558  |

|     |    |    |           |           |           |
|-----|----|----|-----------|-----------|-----------|
| 7.  | 6. | 0. | 0.620700  | -0.709818 | -0.629339 |
| 8.  | 6. | 0. | 1.641159  | 0.174616  | -0.654930 |
| 9.  | 8. | 0. | 1.450145  | 1.503707  | -0.363356 |
| 10. | 6. | 0. | 0.204921  | 2.023513  | -0.069879 |
| 11. | 6. | 0. | 3.080670  | -0.132770 | -0.921192 |
| 12. | 6. | 0. | 3.917800  | -0.216269 | 0.379860  |
| 13. | 8. | 0. | 3.466069  | -1.289148 | 1.200274  |
| 14. | 6. | 0. | 5.388377  | -0.475254 | 0.084236  |
| 15. | 8. | 0. | 0.150895  | 3.229058  | 0.157798  |
| 16. | 8. | 0. | -2.431058 | 2.911273  | 0.488048  |
| 17. | 8. | 0. | -4.164836 | -1.450929 | -0.057176 |
| 18. | 8. | 0. | -1.719731 | -2.487157 | -0.540765 |
| 19. | 6. | 0. | -1.364984 | -3.273249 | 0.610139  |
| 20. | 1. | 0. | -4.306176 | 1.121288  | 0.413367  |
| 21. | 1. | 0. | 0.805621  | -1.744369 | -0.888135 |
| 22. | 1. | 0. | 3.154470  | -1.092880 | -1.440858 |
| 23. | 1. | 0. | 3.495712  | 0.645570  | -1.571401 |
| 24. | 1. | 0. | 3.817084  | 0.742390  | 0.912663  |
| 25. | 1. | 0. | 2.534016  | -1.130671 | 1.405110  |
| 26. | 1. | 0. | 5.506808  | -1.414383 | -0.465855 |
| 27. | 1. | 0. | 5.948112  | -0.555349 | 1.019505  |
| 28. | 1. | 0. | 5.815836  | 0.337338  | -0.510708 |
| 29. | 1. | 0. | -1.553626 | 3.365223  | 0.438100  |
| 30. | 1. | 0. | -3.828278 | -2.305937 | -0.376553 |
| 31. | 1. | 0. | -2.097162 | -3.147523 | 1.416494  |
| 32. | 1. | 0. | -0.372697 | -2.998552 | 0.983783  |
| 33. | 1. | 0. | -1.353633 | -4.314268 | 0.281832  |

### Conformer 2-3

| 2-3 |      | Standard Orientation<br>(Ångstroms) |           |           |           |
|-----|------|-------------------------------------|-----------|-----------|-----------|
| No. | Atom | Type                                | X         | Y         | Z         |
| 1.  | 6.   | 0.                                  | -3.211402 | 0.994398  | 0.393357  |
| 2.  | 6.   | 0.                                  | -3.130419 | -0.398165 | 0.416515  |
| 3.  | 6.   | 0.                                  | -1.917656 | -1.066249 | 0.163875  |
| 4.  | 6.   | 0.                                  | -0.752801 | -0.339465 | -0.073844 |
| 5.  | 6.   | 0.                                  | -0.826112 | 1.080675  | -0.105483 |
| 6.  | 6.   | 0.                                  | -2.066032 | 1.743936  | 0.121728  |
| 7.  | 6.   | 0.                                  | 0.538103  | -0.950407 | -0.276246 |
| 8.  | 6.   | 0.                                  | 1.621612  | -0.185322 | -0.512993 |
| 9.  | 8.   | 0.                                  | 1.537920  | 1.184597  | -0.580491 |
| 10. | 6.   | 0.                                  | 0.357046  | 1.862648  | -0.366260 |

|     |    |    |           |           |           |
|-----|----|----|-----------|-----------|-----------|
| 11. | 6. | 0. | 3.025153  | -0.658456 | -0.729798 |
| 12. | 6. | 0. | 3.998062  | -0.209338 | 0.372185  |
| 13. | 8. | 0. | 3.539999  | -0.826342 | 1.574976  |
| 14. | 6. | 0. | 5.438758  | -0.609335 | 0.053573  |
| 15. | 8. | 0. | 0.406659  | 3.089820  | -0.422412 |
| 16. | 8. | 0. | -2.161986 | 3.080117  | 0.093207  |
| 17. | 8. | 0. | -4.237650 | -1.125348 | 0.691205  |
| 18. | 8. | 0. | -1.941474 | -2.455870 | 0.215208  |
| 19. | 6. | 0. | -2.070220 | -3.082795 | -1.071905 |
| 20. | 1. | 0. | -4.153388 | 1.491556  | 0.589073  |
| 21. | 1. | 0. | 0.648581  | -2.023833 | -0.199036 |
| 22. | 1. | 0. | 3.029292  | -1.751669 | -0.778914 |
| 23. | 1. | 0. | 3.385717  | -0.274292 | -1.692010 |
| 24. | 1. | 0. | 3.934712  | 0.885986  | 0.457351  |
| 25. | 1. | 0. | 4.065215  | -0.477262 | 2.306643  |
| 26. | 1. | 0. | 5.519322  | -1.695506 | -0.057174 |
| 27. | 1. | 0. | 6.110923  | -0.300915 | 0.862090  |
| 28. | 1. | 0. | 5.790917  | -0.134325 | -0.868117 |
| 29. | 1. | 0. | -1.256630 | 3.429625  | -0.100680 |
| 30. | 1. | 0. | -3.939653 | -2.047352 | 0.778126  |
| 31. | 1. | 0. | -1.213569 | -2.846440 | -1.712098 |
| 32. | 1. | 0. | -2.990392 | -2.765195 | -1.576831 |
| 33. | 1. | 0. | -2.103333 | -4.158926 | -0.890182 |

#### Conformer 2-4

| 2-4 |      | Standard Orientation<br>(Ångstroms) |           |           |           |
|-----|------|-------------------------------------|-----------|-----------|-----------|
| No. | Atom | Type                                | X         | Y         | Z         |
| 1.  | 6.   | 0.                                  | -3.228624 | 0.843853  | 0.445431  |
| 2.  | 6.   | 0.                                  | -3.055314 | -0.539817 | 0.421852  |
| 3.  | 6.   | 0.                                  | -1.805256 | -1.117000 | 0.125186  |
| 4.  | 6.   | 0.                                  | -0.698082 | -0.305198 | -0.108837 |
| 5.  | 6.   | 0.                                  | -0.864303 | 1.107312  | -0.089616 |
| 6.  | 6.   | 0.                                  | -2.141344 | 1.677962  | 0.179358  |
| 7.  | 6.   | 0.                                  | 0.627312  | -0.821090 | -0.357396 |
| 8.  | 6.   | 0.                                  | 1.655150  | 0.022858  | -0.593170 |
| 9.  | 8.   | 0.                                  | 1.482849  | 1.385953  | -0.592676 |
| 10. | 6.   | 0.                                  | 0.259616  | 1.975592  | -0.342530 |
| 11. | 6.   | 0.                                  | 3.087401  | -0.354199 | -0.803303 |
| 12. | 6.   | 0.                                  | 3.928335  | -0.230577 | 0.492831  |
| 13. | 8.   | 0.                                  | 3.474307  | -1.152147 | 1.477467  |

|     |    |    |           |           |           |
|-----|----|----|-----------|-----------|-----------|
| 14. | 6. | 0. | 5.396394  | -0.544477 | 0.239775  |
| 15. | 8. | 0. | 0.226439  | 3.203154  | -0.357678 |
| 16. | 8. | 0. | -2.328401 | 3.003804  | 0.197641  |
| 17. | 8. | 0. | -4.105335 | -1.346965 | 0.693459  |
| 18. | 8. | 0. | -1.732107 | -2.504876 | 0.132937  |
| 19. | 6. | 0. | -1.861782 | -3.103451 | -1.168700 |
| 20. | 1. | 0. | -4.197612 | 1.270264  | 0.673626  |
| 21. | 1. | 0. | 0.806387  | -1.888456 | -0.346641 |
| 22. | 1. | 0. | 3.142551  | -1.390703 | -1.150082 |
| 23. | 1. | 0. | 3.513439  | 0.293340  | -1.577634 |
| 24. | 1. | 0. | 3.836697  | 0.803268  | 0.862066  |
| 25. | 1. | 0. | 2.547284  | -0.952375 | 1.669154  |
| 26. | 1. | 0. | 5.507205  | -1.562611 | -0.147032 |
| 27. | 1. | 0. | 5.958127  | -0.472804 | 1.174505  |
| 28. | 1. | 0. | 5.827398  | 0.155591  | -0.482065 |
| 29. | 1. | 0. | -1.454289 | 3.422765  | 0.000420  |
| 30. | 1. | 0. | -3.747396 | -2.249793 | 0.748937  |
| 31. | 1. | 0. | -1.046538 | -2.789319 | -1.829129 |
| 32. | 1. | 0. | -2.818961 | -2.837546 | -1.632616 |
| 33. | 1. | 0. | -1.813336 | -4.183604 | -1.018005 |

### Conformer 2-5

| 2-5 |      | Standard Orientation<br>(Ångstroms) |           |           |           |
|-----|------|-------------------------------------|-----------|-----------|-----------|
| No. | Atom | Type                                | X         | Y         | Z         |
| 1.  | 6.   | 0.                                  | 3.193720  | 0.806948  | 0.286108  |
| 2.  | 6.   | 0.                                  | 3.026753  | -0.556819 | 0.041435  |
| 3.  | 6.   | 0.                                  | 1.763470  | -1.097412 | -0.262791 |
| 4.  | 6.   | 0.                                  | 0.650907  | -0.264535 | -0.363468 |
| 5.  | 6.   | 0.                                  | 0.808378  | 1.125531  | -0.105859 |
| 6.  | 6.   | 0.                                  | 2.087838  | 1.655959  | 0.227041  |
| 7.  | 6.   | 0.                                  | -0.662165 | -0.735467 | -0.726320 |
| 8.  | 6.   | 0.                                  | -1.701808 | 0.120246  | -0.779328 |
| 9.  | 8.   | 0.                                  | -1.550814 | 1.458680  | -0.498420 |
| 10. | 6.   | 0.                                  | -0.329142 | 2.009228  | -0.172508 |
| 11. | 6.   | 0.                                  | -3.121819 | -0.229552 | -1.109033 |
| 12. | 6.   | 0.                                  | -3.977259 | -0.655002 | 0.101906  |
| 13. | 8.   | 0.                                  | -3.425499 | -1.889825 | 0.561826  |
| 14. | 6.   | 0.                                  | -4.041073 | 0.384645  | 1.219738  |
| 15. | 8.   | 0.                                  | -0.308534 | 3.220061  | 0.040865  |
| 16. | 8.   | 0.                                  | 2.262000  | 2.960626  | 0.478262  |



|     |    |    |           |           |           |
|-----|----|----|-----------|-----------|-----------|
| 17. | 8. | 0. | 4.099507  | -1.378910 | 0.092132  |
| 18. | 8. | 0. | 1.704787  | -2.466621 | -0.495862 |
| 19. | 6. | 0. | 1.245280  | -3.232339 | 0.631948  |
| 20. | 1. | 0. | 4.173338  | 1.205044  | 0.519997  |
| 21. | 1. | 0. | -0.823914 | -1.778206 | -0.962457 |
| 22. | 1. | 0. | -3.595163 | 0.630041  | -1.593900 |
| 23. | 1. | 0. | -3.125274 | -1.062001 | -1.818578 |
| 24. | 1. | 0. | -4.996465 | -0.822972 | -0.283677 |
| 25. | 1. | 0. | -3.911849 | -2.152996 | 1.353967  |
| 26. | 1. | 0. | -3.050440 | 0.558540  | 1.647817  |
| 27. | 1. | 0. | -4.705229 | 0.040736  | 2.021490  |
| 28. | 1. | 0. | -4.429603 | 1.339490  | 0.853050  |
| 29. | 1. | 0. | 1.376529  | 3.392452  | 0.383273  |
| 30. | 1. | 0. | 3.786692  | -2.248142 | -0.213369 |
| 31. | 1. | 0. | 0.219313  | -2.960195 | 0.900961  |
| 32. | 1. | 0. | 1.895987  | -3.082522 | 1.501829  |
| 33. | 1. | 0. | 1.276006  | -4.279959 | 0.325962  |

### Conformer 2-6

| 2-6 |      | Standard Orientation<br>(Ångstroms) |           |           |           |
|-----|------|-------------------------------------|-----------|-----------|-----------|
| No. | Atom | Type                                | X         | Y         | Z         |
| 1.  | 6.   | 0.                                  | -3.179466 | 1.182872  | -0.295724 |
| 2.  | 6.   | 0.                                  | -3.228644 | -0.208936 | -0.375370 |
| 3.  | 6.   | 0.                                  | -2.070653 | -0.994439 | -0.214263 |
| 4.  | 6.   | 0.                                  | -0.834094 | -0.386183 | -0.013591 |
| 5.  | 6.   | 0.                                  | -0.774509 | 1.032805  | 0.075983  |
| 6.  | 6.   | 0.                                  | -1.957705 | 1.814530  | -0.060184 |
| 7.  | 6.   | 0.                                  | 0.402624  | -1.122217 | 0.094422  |
| 8.  | 6.   | 0.                                  | 1.566864  | -0.478138 | 0.311818  |
| 9.  | 8.   | 0.                                  | 1.609114  | 0.895156  | 0.430768  |
| 10. | 6.   | 0.                                  | 0.485584  | 1.692840  | 0.296970  |
| 11. | 6.   | 0.                                  | 2.925970  | -1.091681 | 0.439760  |
| 12. | 6.   | 0.                                  | 3.984686  | -0.506928 | -0.531925 |
| 13. | 8.   | 0.                                  | 4.406846  | 0.785939  | -0.127173 |
| 14. | 6.   | 0.                                  | 5.233406  | -1.380335 | -0.571583 |
| 15. | 8.   | 0.                                  | 0.663865  | 2.904406  | 0.382527  |
| 16. | 8.   | 0.                                  | -1.930471 | 3.151272  | 0.019904  |
| 17. | 8.   | 0.                                  | -4.409684 | -0.820050 | -0.617482 |
| 18. | 8.   | 0.                                  | -2.223255 | -2.372107 | -0.316949 |
| 19. | 6.   | 0.                                  | -2.357664 | -3.038672 | 0.950817  |
| 20. | 1.   | 0.                                  | -4.080106 | 1.770662  | -0.422562 |

|     |    |    |           |           |           |
|-----|----|----|-----------|-----------|-----------|
| 21. | 1. | 0. | 0.400766  | -2.198189 | -0.021024 |
| 22. | 1. | 0. | 3.305563  | -0.940236 | 1.459156  |
| 23. | 1. | 0. | 2.824370  | -2.169519 | 0.279727  |
| 24. | 1. | 0. | 3.541346  | -0.472046 | -1.541896 |
| 25. | 1. | 0. | 3.621041  | 1.343325  | -0.035394 |
| 26. | 1. | 0. | 5.659543  | -1.481011 | 0.431830  |
| 27. | 1. | 0. | 5.985552  | -0.915592 | -1.213994 |
| 28. | 1. | 0. | 5.007262  | -2.377471 | -0.961551 |
| 29. | 1. | 0. | -0.990937 | 3.416855  | 0.170887  |
| 30. | 1. | 0. | -4.205537 | -1.760815 | -0.757839 |
| 31. | 1. | 0. | -3.224186 | -2.660859 | 1.506203  |
| 32. | 1. | 0. | -1.458270 | -2.906447 | 1.561533  |
| 33. | 1. | 0. | -2.496119 | -4.098675 | 0.729382  |

Conformer 2-7

| 2-7 |      | Standard Orientation<br>(Ångstroms) |           |           |           |
|-----|------|-------------------------------------|-----------|-----------|-----------|
| No. | Atom | Type                                | X         | Y         | Z         |
| 1.  | 6.   | 0.                                  | 3.239087  | 1.103898  | 0.114074  |
| 2.  | 6.   | 0.                                  | 3.259069  | -0.280951 | -0.052124 |
| 3.  | 6.   | 0.                                  | 2.069162  | -1.018963 | -0.204902 |
| 4.  | 6.   | 0.                                  | 0.839641  | -0.365891 | -0.239775 |
| 5.  | 6.   | 0.                                  | 0.808588  | 1.046536  | -0.069149 |
| 6.  | 6.   | 0.                                  | 2.016830  | 1.777182  | 0.120115  |
| 7.  | 6.   | 0.                                  | -0.413880 | -1.047995 | -0.454811 |
| 8.  | 6.   | 0.                                  | -1.572535 | -0.359396 | -0.484346 |
| 9.  | 8.   | 0.                                  | -1.594664 | 1.005781  | -0.290316 |
| 10. | 6.   | 0.                                  | -0.447086 | 1.750628  | -0.079069 |
| 11. | 6.   | 0.                                  | -2.944756 | -0.913939 | -0.706256 |
| 12. | 6.   | 0.                                  | -3.960815 | -0.564054 | 0.412713  |
| 13. | 8.   | 0.                                  | -4.372766 | 0.791681  | 0.339463  |
| 14. | 6.   | 0.                                  | -5.222985 | -1.410294 | 0.293033  |
| 15. | 8.   | 0.                                  | -0.602414 | 2.957256  | 0.084709  |
| 16. | 8.   | 0.                                  | 2.015628  | 3.105431  | 0.292533  |
| 17. | 8.   | 0.                                  | 4.443760  | -0.931438 | -0.070853 |
| 18. | 8.   | 0.                                  | 2.194848  | -2.393724 | -0.366291 |
| 19. | 6.   | 0.                                  | 2.029613  | -3.140761 | 0.851847  |
| 20. | 1.   | 0.                                  | 4.163949  | 1.654321  | 0.234002  |
| 21. | 1.   | 0.                                  | -0.423048 | -2.116138 | -0.628216 |
| 22. | 1.   | 0.                                  | -3.353478 | -0.524779 | -1.648278 |
| 23. | 1.   | 0.                                  | -2.856118 | -2.000098 | -0.806108 |
| 24. | 1.   | 0.                                  | -3.483310 | -0.772124 | 1.385996  |

|     |    |    |           |           |           |
|-----|----|----|-----------|-----------|-----------|
| 25. | 1. | 0. | -3.580224 | 1.347132  | 0.341078  |
| 26. | 1. | 0. | -5.686068 | -1.267121 | -0.688588 |
| 27. | 1. | 0. | -5.943529 | -1.103465 | 1.055344  |
| 28. | 1. | 0. | -5.001577 | -2.473508 | 0.427737  |
| 29. | 1. | 0. | 1.074171  | 3.403737  | 0.263228  |
| 30. | 1. | 0. | 4.245507  | -1.850809 | -0.319411 |
| 31. | 1. | 0. | 1.025228  | -3.000820 | 1.265575  |
| 32. | 1. | 0. | 2.769425  | -2.841016 | 1.603490  |
| 33. | 1. | 0. | 2.174321  | -4.191202 | 0.592091  |

**Table S5.** Gibbs free energies<sup>a</sup> and equilibrium populations<sup>b</sup> of low-energy conformers of cytosporarin (**2**)

| Conformers     | In MeOH                         |           |
|----------------|---------------------------------|-----------|
|                | <i>Boltzmann population (%)</i> | <i>OR</i> |
| <b>2-1</b>     | 11.53                           | 322.56    |
| <b>2-2</b>     | 17.39                           | 349.9     |
| <b>2-3</b>     | 7.98                            | 22.87     |
| <b>2-4</b>     | 20.22                           | 66.1      |
|                |                                 |           |
| <b>2-5</b>     | 1.64                            | -251.39   |
| <b>2-6</b>     | 21.89                           | 95.84     |
| <b>2-7</b>     | 19.34                           | -209.57   |
| <b>Average</b> |                                 | 89.55     |

**Table S6.** Cartesian coordinates for the low-energy reoptimized MMFF conformers of cytosporarin (**2**) at B3LYP/6-31+G(d,p) level of theory in CH<sub>3</sub>OH

Conformer **2-1**

| <b>2-1</b> |      | Standard Orientation<br>(Ångstroms) |           |           |           |
|------------|------|-------------------------------------|-----------|-----------|-----------|
| No.        | Atom | Type                                | X         | Y         | Z         |
| 1.         | 6.   | 0.                                  | -3.299084 | 0.862809  | 0.197751  |
| 2.         | 6.   | 0.                                  | -3.165693 | -0.505707 | -0.039249 |
| 3.         | 6.   | 0.                                  | -1.906543 | -1.090102 | -0.271458 |
| 4.         | 6.   | 0.                                  | -0.762265 | -0.296083 | -0.311974 |
| 5.         | 6.   | 0.                                  | -0.886472 | 1.099096  | -0.064602 |
| 6.         | 6.   | 0.                                  | -2.162893 | 1.673068  | 0.200317  |
| 7.         | 6.   | 0.                                  | 0.552173  | -0.811693 | -0.605633 |
| 8.         | 6.   | 0.                                  | 1.617871  | 0.012279  | -0.617353 |
| 9.         | 8.   | 0.                                  | 1.496522  | 1.354960  | -0.351341 |
| 10.        | 6.   | 0.                                  | 0.281362  | 1.944947  | -0.076026 |
| 11.        | 6.   | 0.                                  | 3.037622  | -0.362971 | -0.906492 |
| 12.        | 6.   | 0.                                  | 3.970640  | -0.201353 | 0.304045  |

|     |    |    |           |           |           |
|-----|----|----|-----------|-----------|-----------|
| 13. | 8. | 0. | 3.499593  | -1.120947 | 1.290228  |
| 14. | 6. | 0. | 5.428422  | -0.477193 | -0.064162 |
| 15. | 8. | 0. | 0.290969  | 3.155519  | 0.138284  |
| 16. | 8. | 0. | -2.305937 | 2.983188  | 0.442406  |
| 17. | 8. | 0. | -4.267759 | -1.290144 | -0.051477 |
| 18. | 8. | 0. | -1.880067 | -2.461286 | -0.500298 |
| 19. | 6. | 0. | -1.550169 | -3.238427 | 0.664512  |
| 20. | 1. | 0. | -4.275882 | 1.294818  | 0.376803  |
| 21. | 1. | 0. | 0.685848  | -1.860599 | -0.833713 |
| 22. | 1. | 0. | 3.069752  | -1.405156 | -1.238630 |
| 23. | 1. | 0. | 3.412919  | 0.265254  | -1.723450 |
| 24. | 1. | 0. | 3.877194  | 0.831560  | 0.672042  |
| 25. | 1. | 0. | 4.007777  | -0.972956 | 2.098309  |
| 26. | 1. | 0. | 5.539639  | -1.494693 | -0.452560 |
| 27. | 1. | 0. | 6.073393  | -0.378023 | 0.816142  |
| 28. | 1. | 0. | 5.789216  | 0.228865  | -0.819369 |
| 29. | 1. | 0. | -1.402585 | 3.384655  | 0.396049  |
| 30. | 1. | 0. | -3.970488 | -2.167763 | -0.348015 |
| 31. | 1. | 0. | -2.272419 | -3.066470 | 1.471500  |
| 32. | 1. | 0. | -0.545812 | -2.996317 | 1.027387  |
| 33. | 1. | 0. | -1.584950 | -4.285505 | 0.357024  |

### Conformer 2-2

| 2-2 |      | Standard Orientation<br>(Ångstroms) |           |           |           |
|-----|------|-------------------------------------|-----------|-----------|-----------|
| No. | Atom | Type                                | X         | Y         | Z         |
| 1.  | 6.   | 0.                                  | -3.309072 | 0.744343  | 0.222202  |
| 2.  | 6.   | 0.                                  | -3.105855 | -0.610772 | -0.037784 |
| 3.  | 6.   | 0.                                  | -1.817989 | -1.124457 | -0.285589 |
| 4.  | 6.   | 0.                                  | -0.719210 | -0.269460 | -0.320456 |
| 5.  | 6.   | 0.                                  | -0.914821 | 1.114031  | -0.054150 |
| 6.  | 6.   | 0.                                  | -2.218022 | 1.615164  | 0.227558  |
| 7.  | 6.   | 0.                                  | 0.620700  | -0.709818 | -0.629339 |
| 8.  | 6.   | 0.                                  | 1.641159  | 0.174616  | -0.654930 |
| 9.  | 8.   | 0.                                  | 1.450145  | 1.503707  | -0.363356 |
| 10. | 6.   | 0.                                  | 0.204921  | 2.023513  | -0.069879 |
| 11. | 6.   | 0.                                  | 3.080670  | -0.132770 | -0.921192 |
| 12. | 6.   | 0.                                  | 3.917800  | -0.216269 | 0.379860  |
| 13. | 8.   | 0.                                  | 3.466069  | -1.289148 | 1.200274  |
| 14. | 6.   | 0.                                  | 5.388377  | -0.475254 | 0.084236  |

|     |    |    |           |           |           |
|-----|----|----|-----------|-----------|-----------|
| 15. | 8. | 0. | 0.150895  | 3.229058  | 0.157798  |
| 16. | 8. | 0. | -2.431058 | 2.911273  | 0.488048  |
| 17. | 8. | 0. | -4.164836 | -1.450929 | -0.057176 |
| 18. | 8. | 0. | -1.719731 | -2.487157 | -0.540765 |
| 19. | 6. | 0. | -1.364984 | -3.273249 | 0.610139  |
| 20. | 1. | 0. | -4.306176 | 1.121288  | 0.413367  |
| 21. | 1. | 0. | 0.805621  | -1.744369 | -0.888135 |
| 22. | 1. | 0. | 3.154470  | -1.092880 | -1.440858 |
| 23. | 1. | 0. | 3.495712  | 0.645570  | -1.571401 |
| 24. | 1. | 0. | 3.817084  | 0.742390  | 0.912663  |
| 25. | 1. | 0. | 2.534016  | -1.130671 | 1.405110  |
| 26. | 1. | 0. | 5.506808  | -1.414383 | -0.465855 |
| 27. | 1. | 0. | 5.948112  | -0.555349 | 1.019505  |
| 28. | 1. | 0. | 5.815836  | 0.337338  | -0.510708 |
| 29. | 1. | 0. | -1.553626 | 3.365223  | 0.438100  |
| 30. | 1. | 0. | -3.828278 | -2.305937 | -0.376553 |
| 31. | 1. | 0. | -2.097162 | -3.147523 | 1.416494  |
| 32. | 1. | 0. | -0.372697 | -2.998552 | 0.983783  |
| 33. | 1. | 0. | -1.353633 | -4.314268 | 0.281832  |

### Conformer 2-3

| 2-3 |      | Standard Orientation<br>(Ångstroms) |           |           |           |
|-----|------|-------------------------------------|-----------|-----------|-----------|
| No. | Atom | Type                                | X         | Y         | Z         |
| 1.  | 6.   | 0.                                  | -3.211402 | 0.994398  | 0.393357  |
| 2.  | 6.   | 0.                                  | -3.130419 | -0.398165 | 0.416515  |
| 3.  | 6.   | 0.                                  | -1.917656 | -1.066249 | 0.163875  |
| 4.  | 6.   | 0.                                  | -0.752801 | -0.339465 | -0.073844 |
| 5.  | 6.   | 0.                                  | -0.826112 | 1.080675  | -0.105483 |
| 6.  | 6.   | 0.                                  | -2.066032 | 1.743936  | 0.121728  |
| 7.  | 6.   | 0.                                  | 0.538103  | -0.950407 | -0.276246 |
| 8.  | 6.   | 0.                                  | 1.621612  | -0.185322 | -0.512993 |
| 9.  | 8.   | 0.                                  | 1.537920  | 1.184597  | -0.580491 |
| 10. | 6.   | 0.                                  | 0.357046  | 1.862648  | -0.366260 |
| 11. | 6.   | 0.                                  | 3.025153  | -0.658456 | -0.729798 |
| 12. | 6.   | 0.                                  | 3.998062  | -0.209338 | 0.372185  |
| 13. | 8.   | 0.                                  | 3.539999  | -0.826342 | 1.574976  |
| 14. | 6.   | 0.                                  | 5.438758  | -0.609335 | 0.053573  |
| 15. | 8.   | 0.                                  | 0.406659  | 3.089820  | -0.422412 |
| 16. | 8.   | 0.                                  | -2.161986 | 3.080117  | 0.093207  |
| 17. | 8.   | 0.                                  | -4.237650 | -1.125348 | 0.691205  |

|     |    |    |           |           |           |
|-----|----|----|-----------|-----------|-----------|
| 18. | 8. | 0. | -1.941474 | -2.455870 | 0.215208  |
| 19. | 6. | 0. | -2.070220 | -3.082795 | -1.071905 |
| 20. | 1. | 0. | -4.153388 | 1.491556  | 0.589073  |
| 21. | 1. | 0. | 0.648581  | -2.023833 | -0.199036 |
| 22. | 1. | 0. | 3.029292  | -1.751669 | -0.778914 |
| 23. | 1. | 0. | 3.385717  | -0.274292 | -1.692010 |
| 24. | 1. | 0. | 3.934712  | 0.885986  | 0.457351  |
| 25. | 1. | 0. | 4.065215  | -0.477262 | 2.306643  |
| 26. | 1. | 0. | 5.519322  | -1.695506 | -0.057174 |
| 27. | 1. | 0. | 6.110923  | -0.300915 | 0.862090  |
| 28. | 1. | 0. | 5.790917  | -0.134325 | -0.868117 |
| 29. | 1. | 0. | -1.256630 | 3.429625  | -0.100680 |
| 30. | 1. | 0. | -3.939653 | -2.047352 | 0.778126  |
| 31. | 1. | 0. | -1.213569 | -2.846440 | -1.712098 |
| 32. | 1. | 0. | -2.990392 | -2.765195 | -1.576831 |
| 33. | 1. | 0. | -2.103333 | -4.158926 | -0.890182 |

#### Conformer 2-4

| 2 -4 |      | Standard Orientation<br>(Ångstroms) |           |           |           |
|------|------|-------------------------------------|-----------|-----------|-----------|
| No.  | Atom | Type                                | X         | Y         | Z         |
| 1.   | 6.   | 0.                                  | -3.228624 | 0.843853  | 0.445431  |
| 2.   | 6.   | 0.                                  | -3.055314 | -0.539817 | 0.421852  |
| 3.   | 6.   | 0.                                  | -1.805256 | -1.117000 | 0.125186  |
| 4.   | 6.   | 0.                                  | -0.698082 | -0.305198 | -0.108837 |
| 5.   | 6.   | 0.                                  | -0.864303 | 1.107312  | -0.089616 |
| 6.   | 6.   | 0.                                  | -2.141344 | 1.677962  | 0.179358  |
| 7.   | 6.   | 0.                                  | 0.627312  | -0.821090 | -0.357396 |
| 8.   | 6.   | 0.                                  | 1.655150  | 0.022858  | -0.593170 |
| 9.   | 8.   | 0.                                  | 1.482849  | 1.385953  | -0.592676 |
| 10.  | 6.   | 0.                                  | 0.259616  | 1.975592  | -0.342530 |
| 11.  | 6.   | 0.                                  | 3.087401  | -0.354199 | -0.803303 |
| 12.  | 6.   | 0.                                  | 3.928335  | -0.230577 | 0.492831  |
| 13.  | 8.   | 0.                                  | 3.474307  | -1.152147 | 1.477467  |
| 14.  | 6.   | 0.                                  | 5.396394  | -0.544477 | 0.239775  |
| 15.  | 8.   | 0.                                  | 0.226439  | 3.203154  | -0.357678 |
| 16.  | 8.   | 0.                                  | -2.328401 | 3.003804  | 0.197641  |
| 17.  | 8.   | 0.                                  | -4.105335 | -1.346965 | 0.693459  |

|     |    |    |           |           |           |
|-----|----|----|-----------|-----------|-----------|
| 18. | 8. | 0. | -1.732107 | -2.504876 | 0.132937  |
| 19. | 6. | 0. | -1.861782 | -3.103451 | -1.168700 |
| 20. | 1. | 0. | -4.197612 | 1.270264  | 0.673626  |
| 21. | 1. | 0. | 0.806387  | -1.888456 | -0.346641 |
| 22. | 1. | 0. | 3.142551  | -1.390703 | -1.150082 |
| 23. | 1. | 0. | 3.513439  | 0.293340  | -1.577634 |
| 24. | 1. | 0. | 3.836697  | 0.803268  | 0.862066  |
| 25. | 1. | 0. | 2.547284  | -0.952375 | 1.669154  |
| 26. | 1. | 0. | 5.507205  | -1.562611 | -0.147032 |
| 27. | 1. | 0. | 5.958127  | -0.472804 | 1.174505  |
| 28. | 1. | 0. | 5.827398  | 0.155591  | -0.482065 |
| 29. | 1. | 0. | -1.454289 | 3.422765  | 0.000420  |
| 30. | 1. | 0. | -3.747396 | -2.249793 | 0.748937  |
| 31. | 1. | 0. | -1.046538 | -2.789319 | -1.829129 |
| 32. | 1. | 0. | -2.818961 | -2.837546 | -1.632616 |
| 33. | 1. | 0. | -1.813336 | -4.183604 | -1.018005 |

### Conformer 2-5

| 2-5 |      | Standard Orientation<br>(Ångstroms) |           |           |           |
|-----|------|-------------------------------------|-----------|-----------|-----------|
| No. | Atom | Type                                | X         | Y         | Z         |
| 1.  | 6.   | 0.                                  | 3.193720  | 0.806948  | 0.286108  |
| 2.  | 6.   | 0.                                  | 3.026753  | -0.556819 | 0.041435  |
| 3.  | 6.   | 0.                                  | 1.763470  | -1.097412 | -0.262791 |
| 4.  | 6.   | 0.                                  | 0.650907  | -0.264535 | -0.363468 |
| 5.  | 6.   | 0.                                  | 0.808378  | 1.125531  | -0.105859 |
| 6.  | 6.   | 0.                                  | 2.087838  | 1.655959  | 0.227041  |
| 7.  | 6.   | 0.                                  | -0.662165 | -0.735467 | -0.726320 |
| 8.  | 6.   | 0.                                  | -1.701808 | 0.120246  | -0.779328 |
| 9.  | 8.   | 0.                                  | -1.550814 | 1.458680  | -0.498420 |
| 10. | 6.   | 0.                                  | -0.329142 | 2.009228  | -0.172508 |
| 11. | 6.   | 0.                                  | -3.121819 | -0.229552 | -1.109033 |
| 12. | 6.   | 0.                                  | -3.977259 | -0.655002 | 0.101906  |
| 13. | 8.   | 0.                                  | -3.425499 | -1.889825 | 0.561826  |
| 14. | 6.   | 0.                                  | -4.041073 | 0.384645  | 1.219738  |
| 15. | 8.   | 0.                                  | -0.308534 | 3.220061  | 0.040865  |
| 16. | 8.   | 0.                                  | 2.262000  | 2.960626  | 0.478262  |
| 17. | 8.   | 0.                                  | 4.099507  | -1.378910 | 0.092132  |
| 18. | 8.   | 0.                                  | 1.704787  | -2.466621 | -0.495862 |

|     |    |    |           |           |           |
|-----|----|----|-----------|-----------|-----------|
| 19. | 6. | 0. | 1.245280  | -3.232339 | 0.631948  |
| 20. | 1. | 0. | 4.173338  | 1.205044  | 0.519997  |
| 21. | 1. | 0. | -0.823914 | -1.778206 | -0.962457 |
| 22. | 1. | 0. | -3.595163 | 0.630041  | -1.593900 |
| 23. | 1. | 0. | -3.125274 | -1.062001 | -1.818578 |
| 24. | 1. | 0. | -4.996465 | -0.822972 | -0.283677 |
| 25. | 1. | 0. | -3.911849 | -2.152996 | 1.353967  |
| 26. | 1. | 0. | -3.050440 | 0.558540  | 1.647817  |
| 27. | 1. | 0. | -4.705229 | 0.040736  | 2.021490  |
| 28. | 1. | 0. | -4.429603 | 1.339490  | 0.853050  |
| 29. | 1. | 0. | 1.376529  | 3.392452  | 0.383273  |
| 30. | 1. | 0. | 3.786692  | -2.248142 | -0.213369 |
| 31. | 1. | 0. | 0.219313  | -2.960195 | 0.900961  |
| 32. | 1. | 0. | 1.895987  | -3.082522 | 1.501829  |
| 33. | 1. | 0. | 1.276006  | -4.279959 | 0.325962  |

### Conformer 2-6

| 2-6 |      | Standard Orientation<br>(Ångstroms) |           |           |           |
|-----|------|-------------------------------------|-----------|-----------|-----------|
| No. | Atom | Type                                | X         | Y         | Z         |
| 1.  | 6.   | 0.                                  | -3.179466 | 1.182872  | -0.295724 |
| 2.  | 6.   | 0.                                  | -3.228644 | -0.208936 | -0.375370 |
| 3.  | 6.   | 0.                                  | -2.070653 | -0.994439 | -0.214263 |
| 4.  | 6.   | 0.                                  | -0.834094 | -0.386183 | -0.013591 |
| 5.  | 6.   | 0.                                  | -0.774509 | 1.032805  | 0.075983  |
| 6.  | 6.   | 0.                                  | -1.957705 | 1.814530  | -0.060184 |
| 7.  | 6.   | 0.                                  | 0.402624  | -1.122217 | 0.094422  |
| 8.  | 6.   | 0.                                  | 1.566864  | -0.478138 | 0.311818  |
| 9.  | 8.   | 0.                                  | 1.609114  | 0.895156  | 0.430768  |
| 10. | 6.   | 0.                                  | 0.485584  | 1.692840  | 0.296970  |
| 11. | 6.   | 0.                                  | 2.925970  | -1.091681 | 0.439760  |
| 12. | 6.   | 0.                                  | 3.984686  | -0.506928 | -0.531925 |
| 13. | 8.   | 0.                                  | 4.406846  | 0.785939  | -0.127173 |
| 14. | 6.   | 0.                                  | 5.233406  | -1.380335 | -0.571583 |
| 15. | 8.   | 0.                                  | 0.663865  | 2.904406  | 0.382527  |
| 16. | 8.   | 0.                                  | -1.930471 | 3.151272  | 0.019904  |
| 17. | 8.   | 0.                                  | -4.409684 | -0.820050 | -0.617482 |
| 18. | 8.   | 0.                                  | -2.223255 | -2.372107 | -0.316949 |
| 19. | 6.   | 0.                                  | -2.357664 | -3.038672 | 0.950817  |
| 20. | 1.   | 0.                                  | -4.080106 | 1.770662  | -0.422562 |
| 21. | 1.   | 0.                                  | 0.400766  | -2.198189 | -0.021024 |



|     |    |    |           |           |           |
|-----|----|----|-----------|-----------|-----------|
| 22. | 1. | 0. | 3.305563  | -0.940236 | 1.459156  |
| 23. | 1. | 0. | 2.824370  | -2.169519 | 0.279727  |
| 24. | 1. | 0. | 3.541346  | -0.472046 | -1.541896 |
| 25. | 1. | 0. | 3.621041  | 1.343325  | -0.035394 |
| 26. | 1. | 0. | 5.659543  | -1.481011 | 0.431830  |
| 27. | 1. | 0. | 5.985552  | -0.915592 | -1.213994 |
| 28. | 1. | 0. | 5.007262  | -2.377471 | -0.961551 |
| 29. | 1. | 0. | -0.990937 | 3.416855  | 0.170887  |
| 30. | 1. | 0. | -4.205537 | -1.760815 | -0.757839 |
| 31. | 1. | 0. | -3.224186 | -2.660859 | 1.506203  |
| 32. | 1. | 0. | -1.458270 | -2.906447 | 1.561533  |
| 33. | 1. | 0. | -2.496119 | -4.098675 | 0.729382  |

### Conformer 2-7

| 2-7 |      | Standard Orientation<br>(Ångstroms) |           |           |           |
|-----|------|-------------------------------------|-----------|-----------|-----------|
| No. | Atom | Type                                | X         | Y         | Z         |
| 1.  | 6.   | 0.                                  | 3.239087  | 1.103898  | 0.114074  |
| 2.  | 6.   | 0.                                  | 3.259069  | -0.280951 | -0.052124 |
| 3.  | 6.   | 0.                                  | 2.069162  | -1.018963 | -0.204902 |
| 4.  | 6.   | 0.                                  | 0.839641  | -0.365891 | -0.239775 |
| 5.  | 6.   | 0.                                  | 0.808588  | 1.046536  | -0.069149 |
| 6.  | 6.   | 0.                                  | 2.016830  | 1.777182  | 0.120115  |
| 7.  | 6.   | 0.                                  | -0.413880 | -1.047995 | -0.454811 |
| 8.  | 6.   | 0.                                  | -1.572535 | -0.359396 | -0.484346 |
| 9.  | 8.   | 0.                                  | -1.594664 | 1.005781  | -0.290316 |
| 10. | 6.   | 0.                                  | -0.447086 | 1.750628  | -0.079069 |
| 11. | 6.   | 0.                                  | -2.944756 | -0.913939 | -0.706256 |
| 12. | 6.   | 0.                                  | -3.960815 | -0.564054 | 0.412713  |
| 13. | 8.   | 0.                                  | -4.372766 | 0.791681  | 0.339463  |
| 14. | 6.   | 0.                                  | -5.222985 | -1.410294 | 0.293033  |
| 15. | 8.   | 0.                                  | -0.602414 | 2.957256  | 0.084709  |
| 16. | 8.   | 0.                                  | 2.015628  | 3.105431  | 0.292533  |
| 17. | 8.   | 0.                                  | 4.443760  | -0.931438 | -0.070853 |
| 18. | 8.   | 0.                                  | 2.194848  | -2.393724 | -0.366291 |
| 19. | 6.   | 0.                                  | 2.029613  | -3.140761 | 0.851847  |
| 20. | 1.   | 0.                                  | 4.163949  | 1.654321  | 0.234002  |
| 21. | 1.   | 0.                                  | -0.423048 | -2.116138 | -0.628216 |
| 22. | 1.   | 0.                                  | -3.353478 | -0.524779 | -1.648278 |
| 23. | 1.   | 0.                                  | -2.856118 | -2.000098 | -0.806108 |
| 24. | 1.   | 0.                                  | -3.483310 | -0.772124 | 1.385996  |
| 25. | 1.   | 0.                                  | -3.580224 | 1.347132  | 0.341078  |

|     |    |    |           |           |           |
|-----|----|----|-----------|-----------|-----------|
| 26. | 1. | 0. | -5.686068 | -1.267121 | -0.688588 |
| 27. | 1. | 0. | -5.943529 | -1.103465 | 1.055344  |
| 28. | 1. | 0. | -5.001577 | -2.473508 | 0.427737  |
| 29. | 1. | 0. | 1.074171  | 3.403737  | 0.263228  |
| 30. | 1. | 0. | 4.245507  | -1.850809 | -0.319411 |
| 31. | 1. | 0. | 1.025228  | -3.000820 | 1.265575  |
| 32. | 1. | 0. | 2.769425  | -2.841016 | 1.603490  |
| 33. | 1. | 0. | 2.174321  | -4.191202 | 0.592091  |

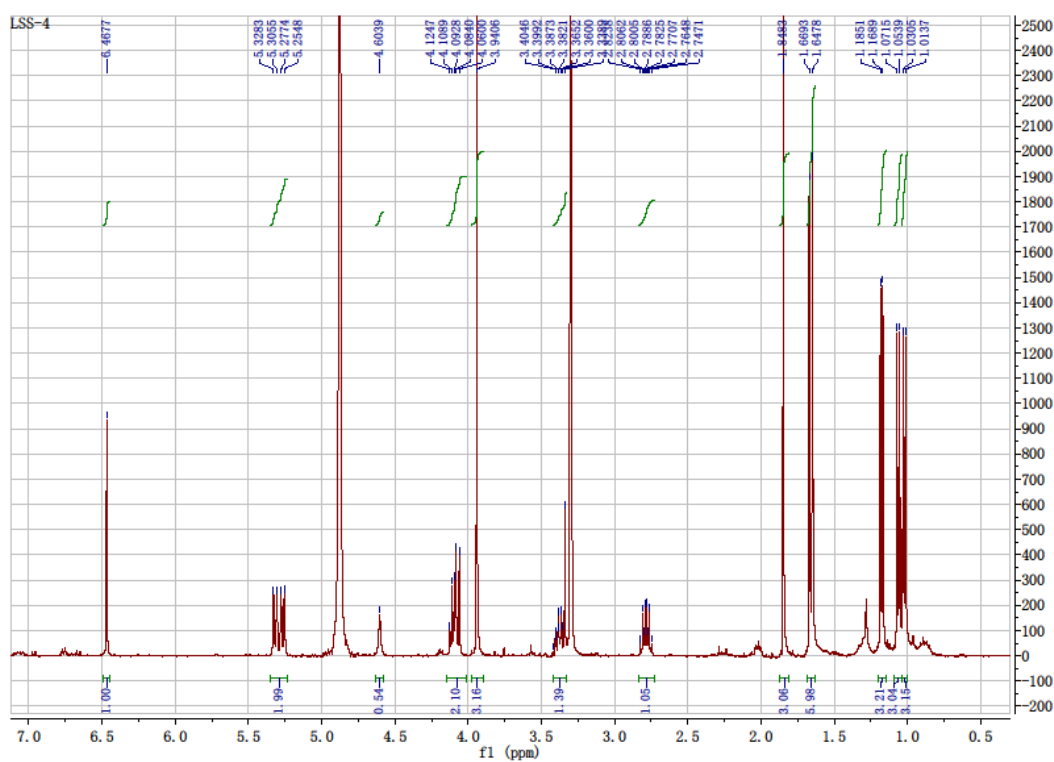

**Figure S1.** <sup>1</sup>H-NMR of cytosprone (1) in CD<sub>3</sub>OD

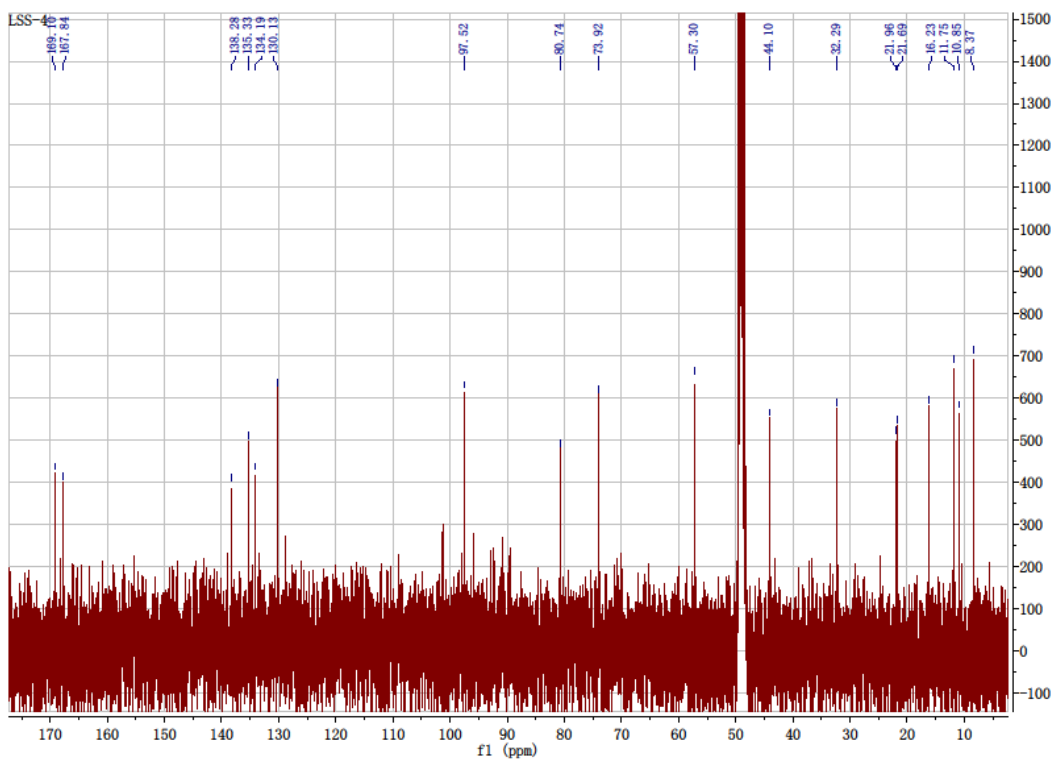

Figure S2.  $^{13}\text{C}$ -NMR of cytosprone (**1**) in  $\text{CD}_3\text{OD}$

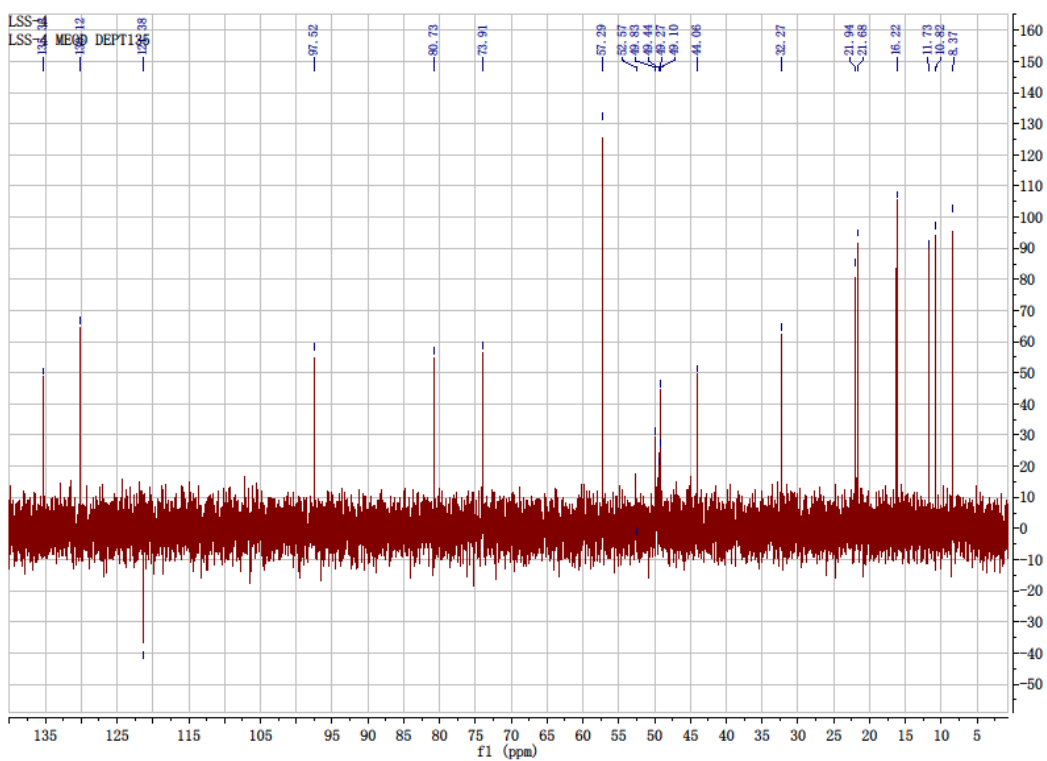

Figure S3. DEPT of cytosprone (**1**) in  $\text{CD}_3\text{OD}$

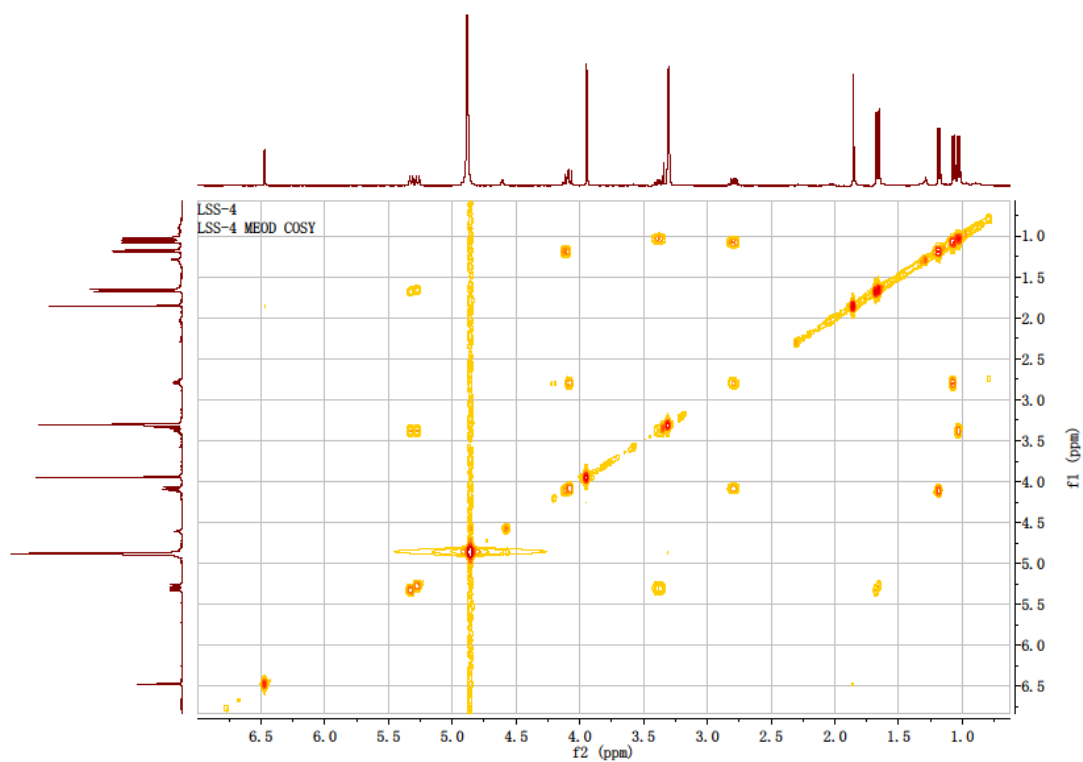

Figure S4.  $^1\text{H}$ - $^1\text{H}$  COSY of cytospyrone (**1**) in  $\text{CD}_3\text{OD}$

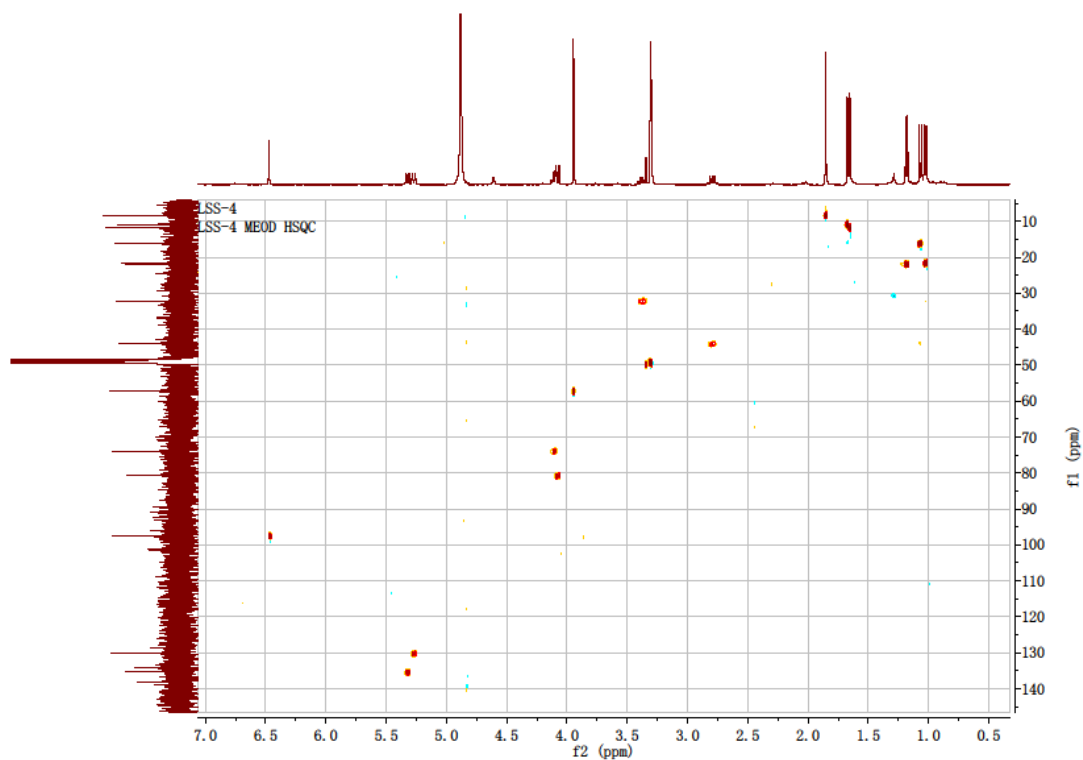

Figure S5. HMQC of cytospyrone (**1**) in  $\text{CD}_3\text{OD}$

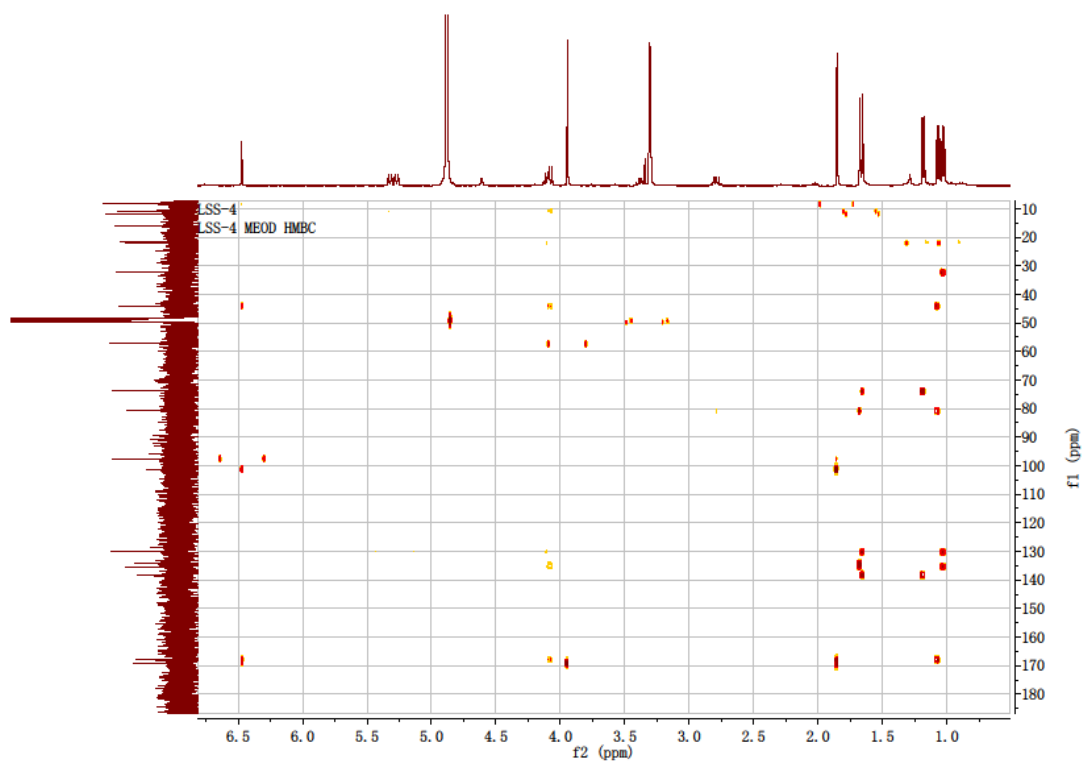

**Figure S6.** HMBC of cytosprone (**1**) in CD<sub>3</sub>OD

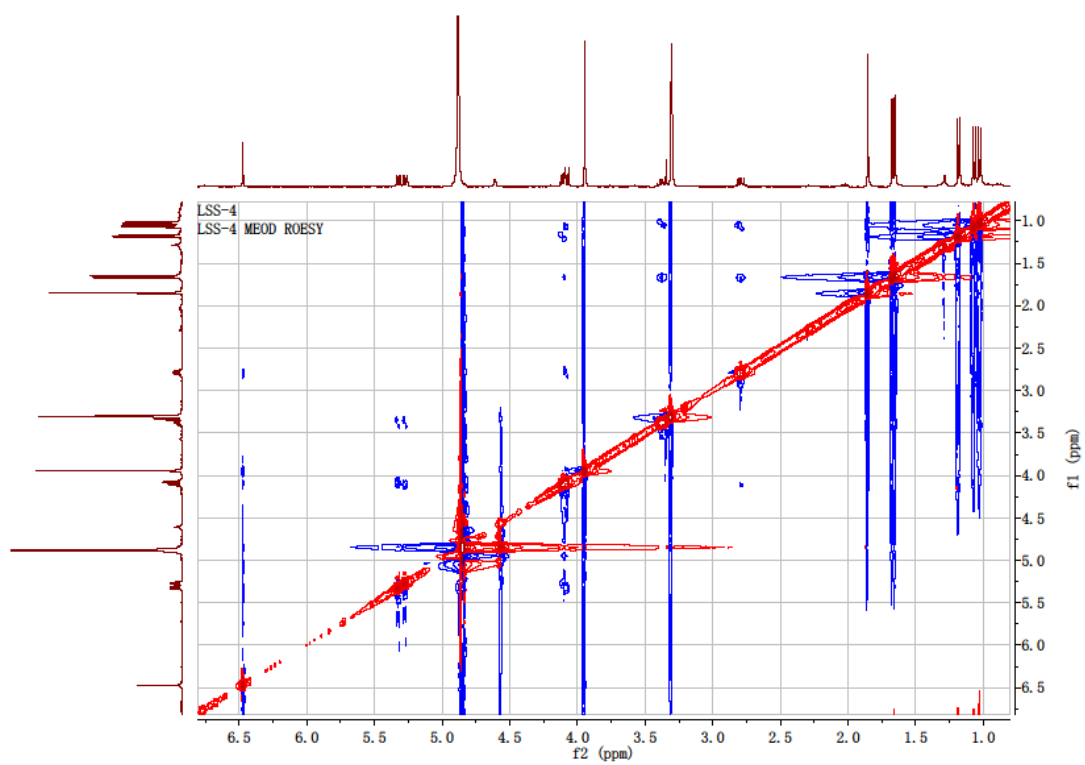

**Figure S7.** ROESY of cytosprone (**1**) in CD<sub>3</sub>OD

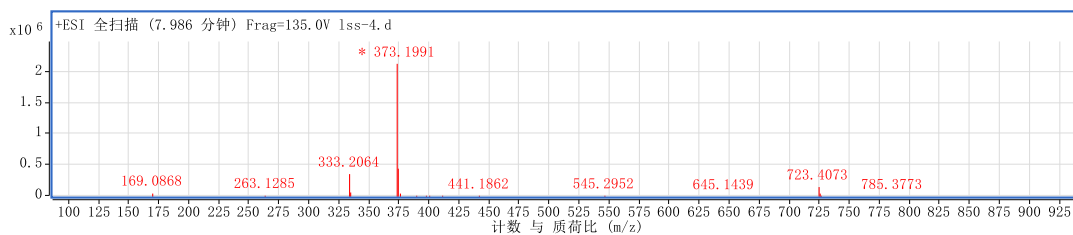

**Figure S8.** HR-ESI-MS of cytospyrone (**1**)

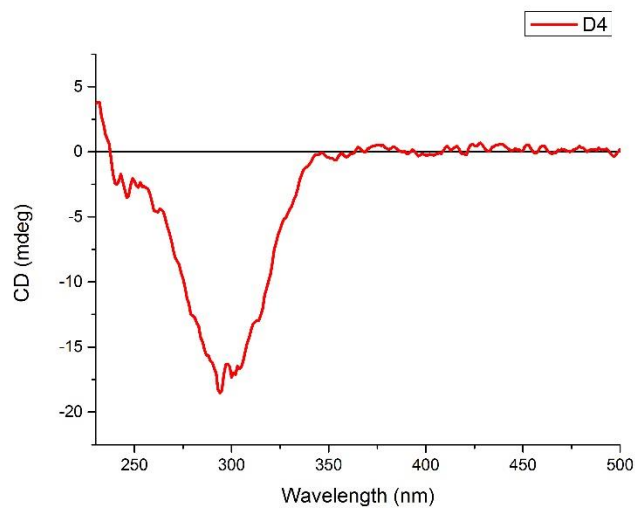

**Figure S9** CD spectrum of cytospyrone (**1**)

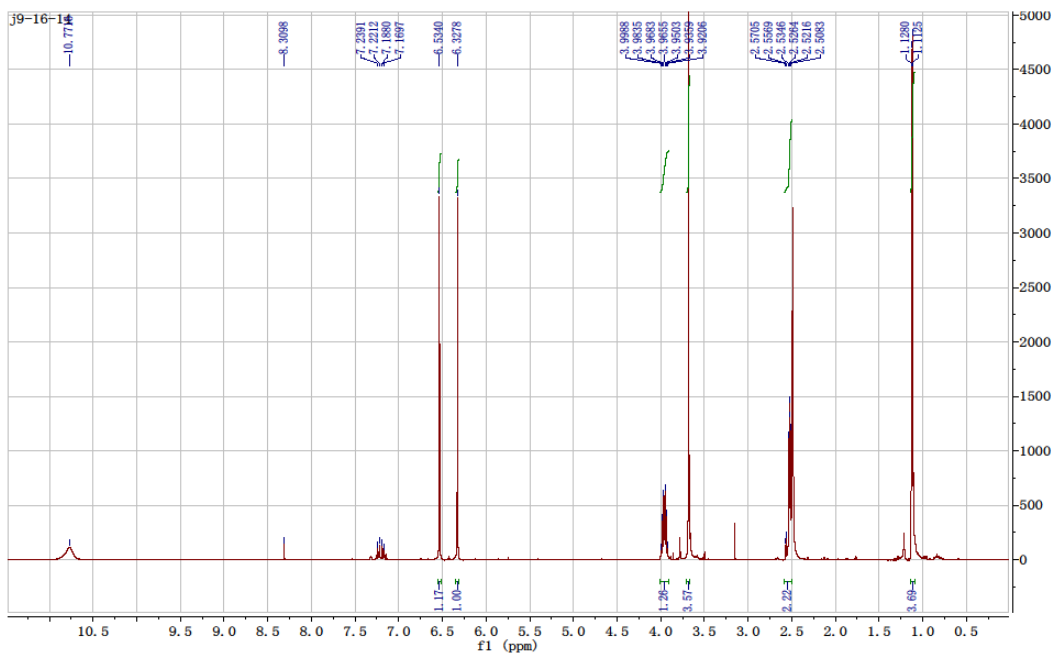

**Figure S10.** <sup>1</sup>H-NMR of cytospyrone (**2**) in DMSO-*d*<sub>6</sub>

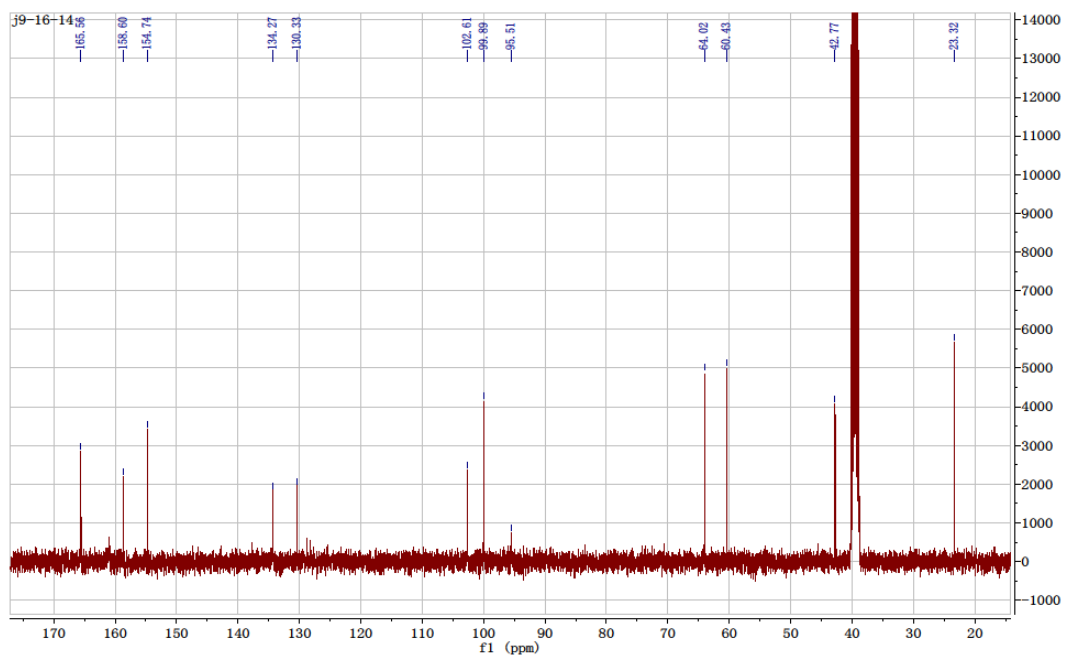

**Figure S11.**  $^{13}\text{C}$ -NMR of cytosporarin (**2**) in  $\text{DMSO-}d_6$

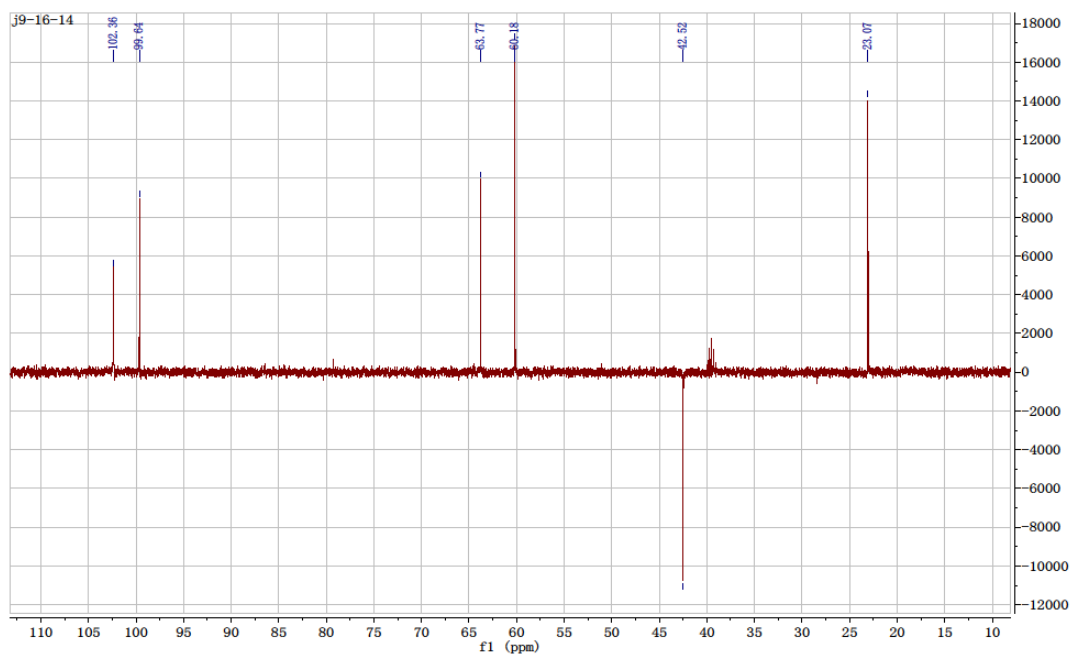

**Figure S12.** DEPT of cytosporarin (**2**) in  $\text{DMSO-}d_6$

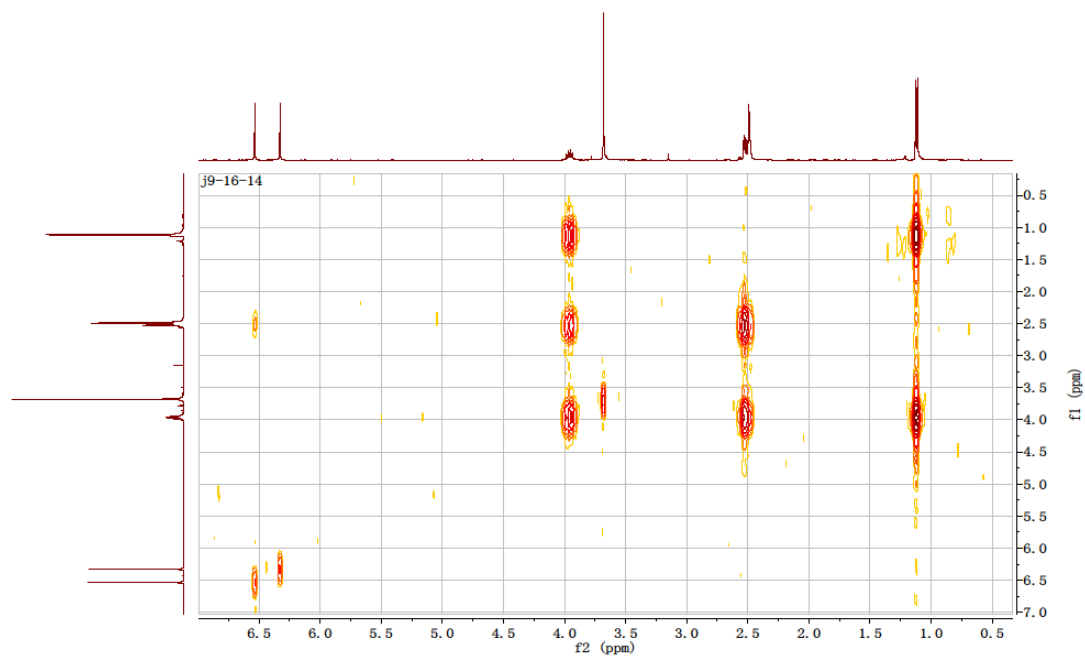

**Figure S13.**  $^1\text{H}$ - $^1\text{H}$  COSY of cytopomarin (2) in  $\text{DMSO-}d_6$

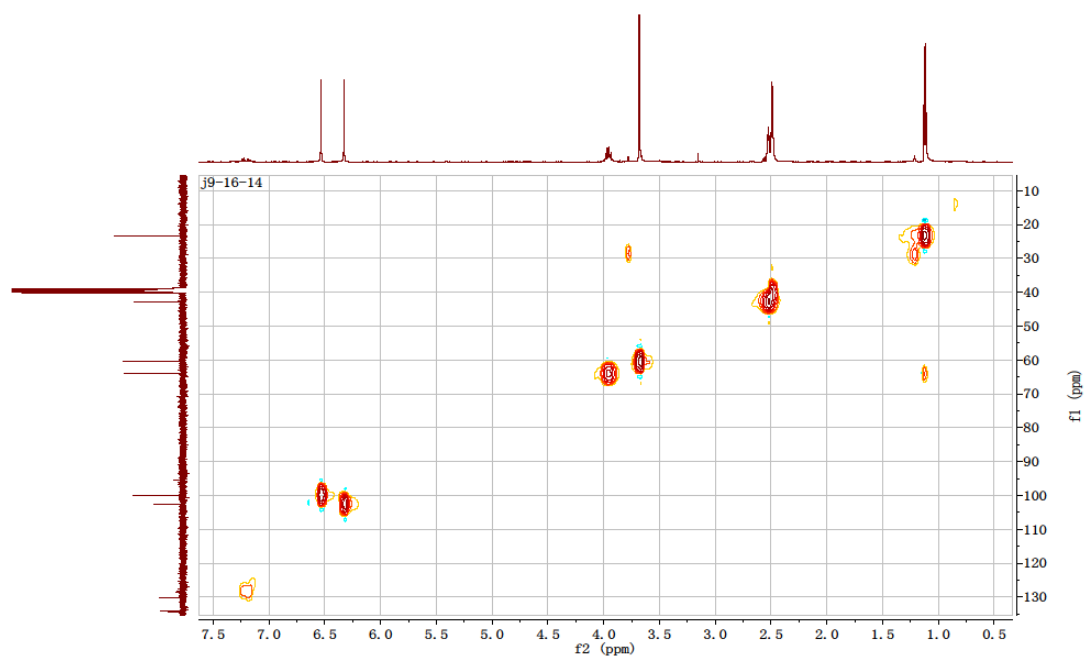

**Figure S14.** HMQC of cytopomarin (2) in  $\text{DMSO-}d_6$



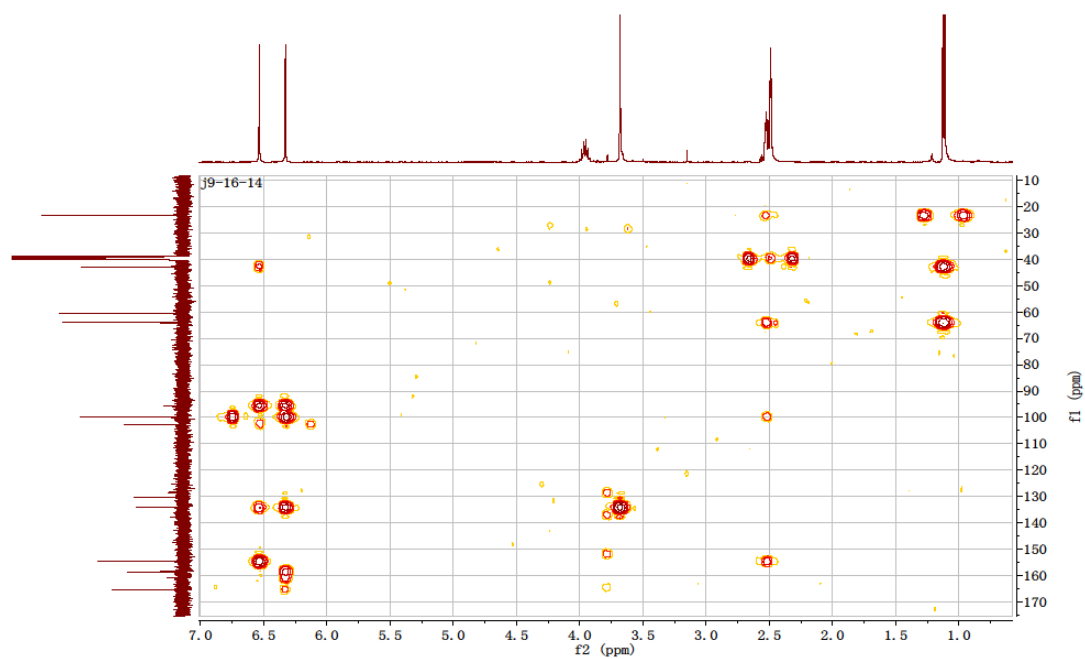

**Figure S15.** HMBC of cytopomarin (**2**) in DMSO-*d*<sub>6</sub>

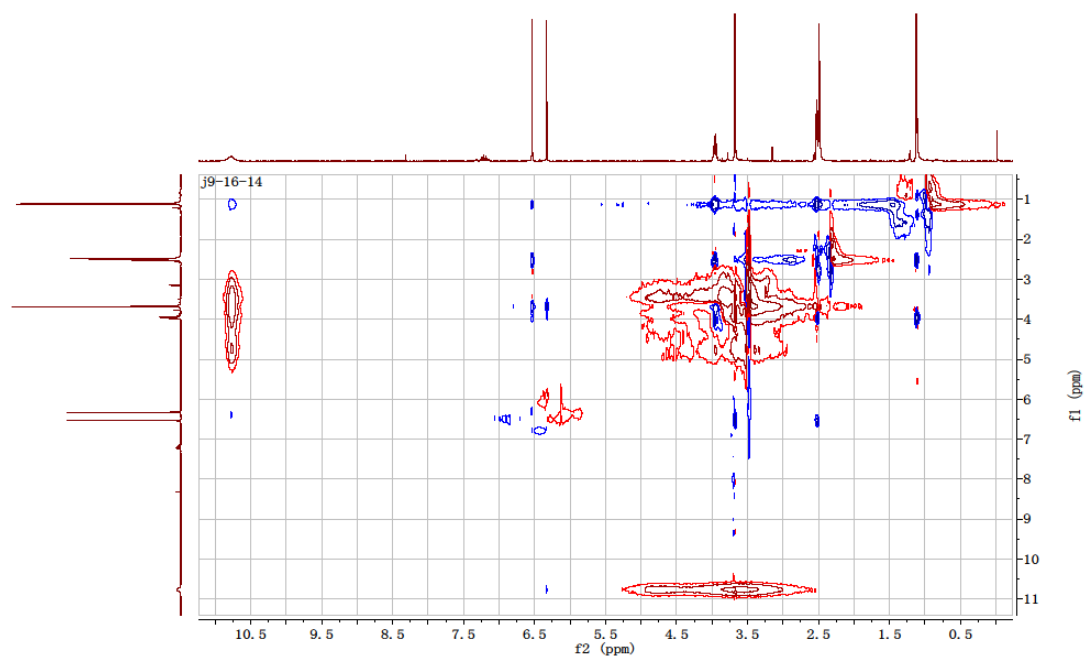

**Figure S16.** ROESY of cytopomarin (**2**) in DMSO-*d*<sub>6</sub>

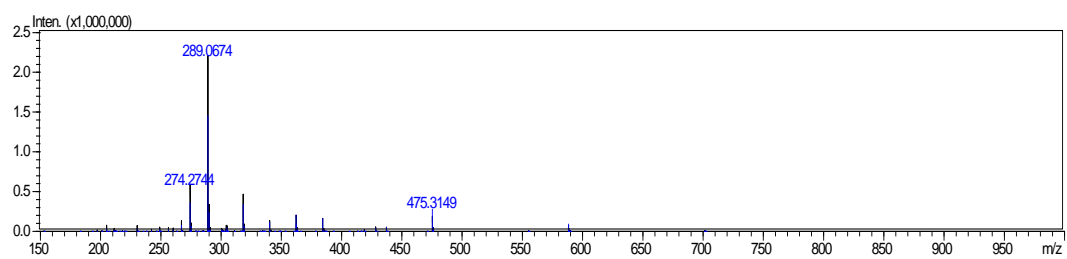

Figure S17. HR-ESI-MS of cytosporarin (2)

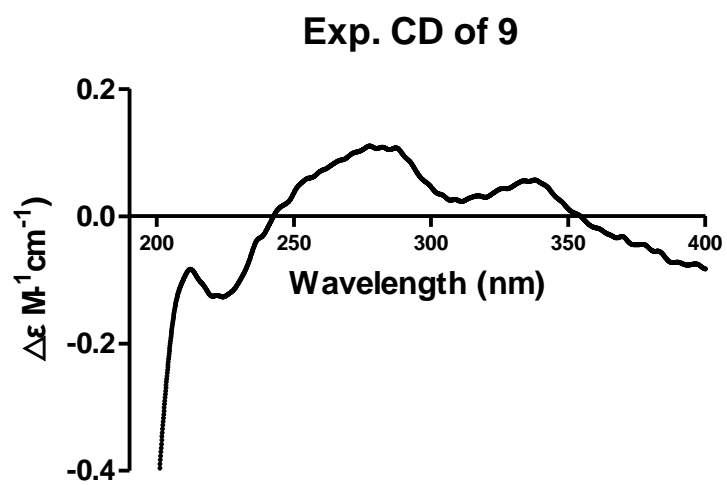

Figure S18. CD spectrum of cytosporarin (2)
